# Supplementary material for: Water-balance and hydrology research in a mountainouspermafrost watershed in upland streams of the Kolyma River,Russia: a database from the Kolyma Water-Balance Station,1948–1997
Source: Copernicus journal article supplement (doi:10.5194/essd-2017-125), 2017-11-17
Supplement: Supplementary file [file essd-2017-125-AC4-supplement.pdf]

1                   **Water-balance and hydrology research in a mountainous**  
2                   **permafrost watershed in upland streams of the Kolyma River,**  
3                   **Russia: a database from the Kolyma Water-Balance Station, 1948-**  
4                   **1997**

5                   \*Olga Makarieva<sup>1,2,3</sup>, Nataliia Nesterova<sup>3,4</sup>, Lyudmila Lebedeva<sup>2</sup>, Sergey Sushansky

6                                           <sup>1</sup>*Gidrotehproekt Ltd, St. Petersburg, 199178, Russia*

7                                           <sup>2</sup>*Melnikov Permafrost Institute, Merzlotnaya St., 36, Yakutsk 677010, Russia*

8                   <sup>3</sup>*Saint Petersburg State University, Institute of Earth Sciences, 7/9 Universitetskaya nab, St.*  
9                                           *Petersburg, Russia 199034*

10                   <sup>4</sup>*State Hydrological Institute, Department of Experimental Hydrology and Mathematical*  
11                   *Modelling of Hydrological Processes, 23 2-ya liniya VO, St. Petersburg, Russia 199053*

12                                           \*omakarieva@gmail.com

13                   **Abstract:** As of 2017, 70 years have passed since the beginning of work at the Kolyma water-  
14                   balance station (KWBS), a unique scientific research hydrological and permafrost catchment.  
15                   The volume and duration (50 continuous years) of hydrometeorological standard and  
16                   experimental data, characterizing the natural conditions and processes occurring in mountainous  
17                   permafrost conditions, significantly exceeds any counterparts elsewhere in the world. The data  
18                   are representative of mountainous territory of the North-East of Russia. In 1997, the station was  
19                   terminated, thereby leaving Russia without operating research watersheds in the permafrost zone.  
20                   This paper describes the dataset containing the series of daily runoff from 10 watersheds with  
21                   area from 0.27 to 21.3 km<sup>2</sup>, precipitation, meteorological observations, evaporation from soil and  
22                   snow, snow surveys, soil thaw and freeze depths, and soil temperature for the period 1948-1997.  
23                   It also highlights the main historical stages of the station's existence, its work and scientific  
24                   significance, and outlines the prospects for its future, where the Kolyma water-balance station  
25                   could be restored to the status of a scientific research watershed and become a valuable  
26                   international center for hydrological research in permafrost. The data is available at  
27                   <https://doi.pangaea.de/10.1594/PANGAEA.881731>.

28                   **Keywords:** water-balance and hydrological research, continuous permafrost, Kontaktovy Creek,  
29                   the Kolyma River, Kolyma water-balance station, streamflow, thaw/freeze depth, precipitation,  
30                   snow cover, evaporation from soil and snow

31

32

## 33 1. Introduction

34 In 2018 we celebrate 70 years since the observations at the Kolyma Water-Balance  
35 station (KWBS) began. This hydrological and permafrost research catchment has accumulated  
36 standard and experimental data unique both in terms of their amount and duration.

37 In the paper «Save northern high-latitude catchments» Laudon et al. (2017) recognize the  
38 KWBS as a currently functioning scientific station, even though scientific research was  
39 suspended here 20 years ago, and nowadays only standard observations at the meteorological site  
40 and one runoff gauge are carried out.

41 Eurasia contributes 75 % of the total terrestrial runoff to the Arctic Ocean and three of  
42 the four major Arctic rivers are located in Siberia (Shiklomanov et al. 2002). Peterson et al.  
43 (2002) suggested that the net discharge from the six largest Eurasian rivers flowing into the  
44 Arctic Ocean (Severnaya Dvina, Pechora, Ob', Yenisey, Lena, and Kolyma) increased by 7%  
45 during the 20<sup>th</sup> century. As it is also mentioned by Laudon et al. (2017), the number of scientific  
46 and hydrological research stations in the Northern regions of the world has decreased by 40%,  
47 and it happened alongside the most significant climate change in the Arctic in recorded history.

48 The Kolyma Water-Balance Station (KWBS) is located in the headwaters of the Kolyma  
49 River (61.85N, 147.67E), in a mountainous cryolithozone (Fig. 1, 2). Water-balance stations are  
50 a historical name of the network of the research watersheds that existed in former USSR. The  
51 overall goal of the water-balance stations network was detailed study of water balance  
52 components on slope and small scales in different environmental settings for the development of  
53 methods of hydrological forecast and flow characteristics assessments for engineering design.  
54 The KWBS was one of 26 water-balance stations of the USSR and the only located in the zone  
55 of continuous permafrost.

56 During the period 1948 to 1997, the KWBS accumulated a huge amount of data on  
57 hydro-meteorological and special observations of a unique duration (40-50 years). At the KWBS  
58 there were 10 hydrological gauges at catchments ranging between 0.27 and 21.3 km<sup>2</sup>, two  
59 meteorological plots, 55 (in total) precipitation gauges, over 30 frost tubes (cryopedometers),  
60 several groundwater wells, evaporation, water-balance and runoff plots. In addition, regular  
61 snow surveys were conducted, as well as experimental investigations of specific hydrological  
62 and permafrost processes.

63 After 1997, special water balance and research observations at the KWBS were ceased.  
64 One weather station and five runoff gauges functioned at the KWBS up to mid-June, 2013, when  
65 an extreme flash flood destroyed four level gauges. Nowadays only standard observations are  
66 conducted at the Nizhnyaya meteorological site and at the Kontaktovy (Nizhny) runoff gauge.

67 The data were published in 40 reports, the first one covering the period 1948-1957.  
68 Following issues were published annually (KWBS Observation Reports, 1959-1997).

69 Though in the last several decades and more recently many research watersheds were  
70 established in Arctic zone of the USA and Canada, to the best of our knowledge, the first  
71 systematic cold-region hydrology observations in North America began not earlier than the  
72 1960s. Such, the Caribou-Poker Creeks Research Watershed was established only in 1969  
73 (Hinzman et al., 2002), 20 years later than KWBS.

74 One may mention numerous scientific catchments in Alaska – Fish Creek (Pacific  
75 Northwest..., 2014), Toolik station (Hoobbie et al., 2003), Tanana River (Yarie et al., 1998),  
76 Kuparuk River (Arp & Stuefer, 2017, Kane & Hinzman, 2009), Imnavait River (Walker &  
77 Walker, 1996), Putuligayuk River (Kane & Hinzman, 2009), as well as Arctic monitoring  
78 programs (NPR-Hydrology (NPR-A Hydrology..., 2018), Arctic Observatory Network (Arctic  
79 Observatory Network..., 2018).

80 The studies at research watersheds of Canada are integrated into scientific programs and  
81 accompanied by data analysis and models development and applications For example, the  
82 Changing Cold Regions Network project (Changing Cold..., 2018) includes field studies on 14  
83 watersheds and the use of two Canadian models CHRM and CLASS. The Improving Processes  
84 & Parameterization for Prediction in Cold Regions Hydrology (IP3) project (Improving

85 Processes..., 2018) combined 10 research watersheds and four hydrological models – CHRM  
86 (Pomeroy et al., 2007), CLASS (Verseghy, 1991), MESH (Pietroniro et al., 2007), GEM (Yeh et  
87 al., 2002).

88 Although there are large mountainous areas in other cold regions of the world, the  
89 combination of extremely severe climate (mean annual air temperature reaches  $-11.3^{\circ}\text{C}$ ) and  
90 continuous permafrost creates unique conditions at KWBS which are not presented at any other  
91 research watershed of the world.

92 Nasybulin (1976) showed that hydrological regime at the KWBS is representative for the  
93 whole Upper Kolyma Plateau. Taking into account the similarity of main landscape types across  
94 mountainous regions of North-East Russia to those found at the KWBS, the conclusion can be  
95 made that hydrological conditions at KWBS are actually representative for vaster ungauged  
96 areas, than described by Nasybulin (1976).

97 Sufficiently long time series of observations which were continuously conducted by  
98 uniform methods and covered pre-warming period are of high importance for the studies of  
99 climate change impact on hydrology in the Arctic.

100 KWBS observation results were reflected in many publications, dedicated to different  
101 aspects of runoff formation in the continuous permafrost region, active layer dynamics,  
102 underlying surface structure and its influence on hydrological processes. Based on the KWBS  
103 data, the following research was carried out:

- 104 • water balance formation (Kuznetsov et al., 1969; Boyarintsev, 1980; Boyarintsev,  
105 Gopchenko, 1992; Suchansky, 2002; Zhuravin, 2004; Lebedeva et al., 2017),
- 106 • peak and spring flood runoff in small rivers in the permafrost zone (Boyarintsev, 1988),
- 107 • base flow (Boyarintsev, Nikolaev, 1986; Glotov, 2002),
- 108 • principles of runoff cryo-regulation (Alekseev et al., 2011),
- 109 • ice content dynamics of rocky talus deposits (Bantsekina, 2001),
- 110 • processes of intra-ground condensation (Reinyuk, 1959; Boyarintsev et al., 1991;  
111 Bantsekina et al., 2009;),
- 112 • floodplain taliks in continuous permafrost (Mikhaylov, 2013) and many others.

113 Collected data were also used for development and testing different geoscience models of:

- 114 • runoff formation (Kuchment et al., 2000; Gusev et al., 2006; Semenova et al., 2013;  
115 Lebedeva et al., 2015; Vinogradov et al., 2015),
- 116 • climatic aspects (Shmakin, 1998),
- 117 • land surface and vegetation dynamics (Tikhmenev, 2008).

118 In this paper, we present a hydrometeorological and permafrost related dataset for  
119 continuous 50 years from 1948 to 1997 for the Kolyma Water-Balance Station (KWBS), the  
120 Kontaktovy Creek watershed, which is representative for vast mountainous territories of  
121 continuous permafrost zone of Eastern Siberia and the North-East of Russia. This dataset is  
122 unique in terms of its volume and duration of hydrometeorological standard and experimental  
123 data. It may be used in many research tasks, but is of particular importance in studying runoff  
124 formation processes and model development in permafrost regions.

## 125 **2. Site description**

126 The Kolyma water-balance station is located in the Tenkinsky district of the Magadan  
127 region of Russia within the Upper-Kolyma highland. The station's territory – the Kontaktovy  
128 Creek catchment with area  $21.3 \text{ km}^2$  – is a part of the Pravy Itrikan River which flows into the  
129 Kulu River basin, which is the right tributary of the Kolyma River. The station is located 16 km  
130 from the Kulu village settlement. It is characterized by a mountain landscape, typical for the  
131 upper reaches of the Kolyma River. The territory of the basin is severely cut up with creek  
132 valleys. These valleys are narrow, with steep slopes, and watershed lines are mostly well  
133 delineated. Absolute elevations of the basin range between 823 m a.s.l. near the Kontaktovy  
134 Creek outlet and 1700 m a.s.l. at watershed divides. The length of the creek is 8.9 km. The

135 catchment is extended in the latitudinal direction and has an asymmetric shape. The slopes of the  
136 catchment area have mainly southern exposure (53% of the slope area), the slopes of the  
137 northern and eastern exposure have a 24% share, the western – 23%. The density of river  
138 network in the basin is 2.5 km per square km. The main river canal is meandering. The steepness  
139 of the slopes ranges from 200 to 800‰ (Fig. 1).

140 The station is located in the continuous permafrost zone. Permafrost thickness varies  
141 from 120 to 210 m in valleys and can reach 300-400 m in highlands, following the relief.  
142 Seasonal soil thaw depth depends on slope exposition, altitude and landscape and changes from  
143 0.2-0.8 m on north-facing slopes to 1.5-3.0 m on south-facing ones.

144 KWBS is situated in the transitional zone between forest-tundra and coniferous taiga. Soil  
145 types vary from stony-rock debris to clayey podzol with partially decayed organic material  
146 underlain by frozen soil and bedrock. Most of the KWBS area is covered by rocky talus,  
147 practically without vegetation (34%). Dwarf cedar and alder shrubs are common at south-facing  
148 slopes and cover about 27% of the territory. Larch sparse woodland with moss-lichen cover is  
149 typical for steep north-facing slopes (12%). Open terrain larch wood (15%) and swampy sparse  
150 growth forest with minimal permafrost thaw depth, constant excessive stagnant moisturizing,  
151 tussock or knobby microrelief (12%) characterize creek valleys. The estimates of landscape  
152 distribution are given here after Korolev (1984) (Fig. 2B).

153 Along the whole length of the Kontaktovy Creek, channel taliks can be found. They go  
154 all the way through the layer of alluvial sediments and their depth may reach 15 m in the cross  
155 section of the Nizhny hydrological gauge (Mikhaylov, 2013) and 5 m on the flood plain (Glotov,  
156 2002). In summer, the talik forms a single hydraulic system with waters of active layer and the  
157 creek channel. In winter it freezes only partially. In the talik located below Kontaktovy-Nizhny  
158 gauge, flow exists till the beginning of snowmelt, which is evidenced by continuous drop of  
159 levels in hydrogeological wells (Glotov, 2002).

## 160 **2.1 History of KWBS**

161 The Kolyma water balance station (KWBS) was established on October 15, 1947 and  
162 was initially known as the Itrikanskaya runoff station of the Dalstroy (Far North Construction  
163 Trust organized in 1931) Hydrometeorological Service. In 1948-1956 and 1957-1969 it was  
164 called the Kulinskaya and the Kolyma runoff station respectively. The primary goal of this  
165 station was studying runoff formation processes in small river catchments in mountain  
166 permafrost landscapes, typical for northeast USSR.

167 As soon as May, 1948, the first runoff observations at the Kontaktovy Creeks and  
168 Vstrecha brook were launched, as well as regular observations at the Nizhnyaya weather station  
169 (850 m a.s.l.). A few months later, on September 1, 1948, observations at the Verkhnyaya  
170 weather station (1220 m a.s.l.) were started. In 1948, stage gauges Sredny, Nizhny and Vstrecha  
171 were equipped with automatic water level recorders, gauging footbridges and flumes.  
172

173 During the period 1949-1957, at the Vstrecha brook catchment, a rain-gauge network was  
174 organized. Runoff gauges at the Severny, Dozhdemerny, Vstrecha brooks were equipped with  
175 various hydrometric facilities. Observations on soil, water and snow evaporation, soil freezing  
176 and thawing commenced, as well as experimental observations at a runoff plot.

177 At the end of the 1940s and early 1950s, technical staff of the station were mainly former  
178 convicts. During the first few years, the workers of the station built houses for themselves,  
179 collected firewood and organized the household. The winter of 1955-56 appeared to be  
180 especially severe for the staff, since due to the deep snow cover it was difficult to move around  
181 the territory of KWBS, there was no transport connection with the Tenkinskaya highway,  
182 delivering of firewood, needed for heating houses and service buildings, was also difficult. When  
183 it was impossible to get to the highway by car, bread and mail were delivered from the Kulu  
184 village settlement utilizing horses once every 7-10 days.

185 Twenty to twenty five staff members were accommodated in three small huts, hardly  
186 suitable for living. That winter they mainly had to collect and prepare firewood in the afternoon;

187 in the morning everybody had to go (despite their rank or position) in deep snow and at -50°C to  
188 the nearest small river valley looking for firewood, then they pulled it back home, where they  
189 were firing furnaces. Only by the time it got dark, it became warm enough to stay in the work-  
190 room and they could start observation data processing.

191 The working day lasted until 10 or 11 p.m. Since there was no electricity, they used  
192 kerosene lamps filled with a mixture of petrol and salt. In summer 1956 there were only 13  
193 people left at the station, some of them were taken to help with haymaking to prepare hay for  
194 their subsidiary holding that consisted of two cows and a horse (as recollected by the Chief of the  
195 station V.G. Osipov and the hydrologist-technician A.I. Ipatieva, Informational letter..., 1988).

196 In 1957 the station was handed over to the jurisdiction of the Kolyma Hydro-  
197 meteorological service administration, and in 1958 the electrification of the station has started.  
198 At that time there were active steps taken toward fitting out the station with new types of devices  
199 and equipment, engaging new specialists in hydro-meteorology, and building accommodation  
200 facilities.

201 In 1960 runoff observations at the Yuzhny brook were begun. The optimization of the  
202 precipitation network was continued meaning the establishment of rain gauges in new locations  
203 and shutting down some non-representative rain gauges. Radio rain gauges were installed.

204 In 1963 two new water-balance sites (##2 and 3) were organized.

205 In 1968 runoff measurements were started at the unique research object, at the Morozova  
206 brook catchment, which has no vegetation cover and is composed of rocky talus.

207 In 1969 the Kolyma runoff station was renamed into the Kolyma Water Balance station  
208 (KWBS). In these years there was a transition to broad experimental water balance observations  
209 of all elements and to an enhanced technical level of research.

210 Since 1970, the KWBS carried out snowpack observations at avalanche sites of the  
211 Tenkinskaya road, as well as stratigraphy, temperature and physical and mechanical properties of  
212 snow at four sites. Since 1980 there were introduced additional observations on dynamics of  
213 icing formation at the Kontaktovy creek. In 1982 observations on soil moisture were started at 3  
214 agro-hydrological sites at the fields of the «Kulu» state farm.

215 In 1976 the station hosted a delegation of USA scientists. They highly praised the  
216 professional and personal qualities of the station's staff members, their commitment, on which  
217 extensive field studies and theoretical works were based, despite the equipment being rather  
218 simple and living conditions extreme. According to Slaughter and Bilello (1977), the data  
219 recorded at the KWBS, were unique and unprecedented for world practice.

220 Since the beginning of the 1990s, the research program at the station has been gradually  
221 cutting back. After 1997, water balance observations at the KWBS were ceased. One weather  
222 station and five runoff gauges functioned at the KWBS up to mid of June, 2013, when an  
223 extreme flash flood destroyed four level gauges. Nowadays only standard observations are  
224 conducted at the Nizhnyaya meteorological site and at the Kontaktovy (Nizhny) runoff gauge.

### 225 **3. Data description**

#### 226 **3.1 Meteorological observations**

227 The observations of meteorological elements were carried out at three meteorological  
228 stations in different periods (Fig. 2A). The database includes daily values of air temperature,  
229 water vapour pressure, vapour pressure deficit, atmospheric pressure, wind speed, low and total  
230 cloud amount, and surface temperature (Table 1).

231 The meteorological station Verkhnyaya (1220 m a.s.l., 1948-1972) was located in the  
232 upper reaches of the Dozhemerny brook in the saddle between two hills. The horizon is closed  
233 by the hills from the south and north which are at 30-40 m distance from the site. The horizon is  
234 open from the east and west, strong winds are observed here. The surface at the station plot is  
235 hummocky, covered with grassy vegetation with no woody vegetation around it. The nearest  
236 building – the station house – was located 48 m away from the station plot. The depth of  
237 seasonal thaw of permafrost reaches 1.5 m.

238 The meteorological station Nizhnyaya (850 m a.s.l., 1948-1997) is located on the edge of  
239 a larch forest, on the terrace-watershed between the Kontaktovy creek and the Ugroza brook,  
240 which has a slight slope to the SW. The nearest trees are located 50 m away, the buildings – 100  
241 m from the station. The site is surrounded by mountains up to 1400 m a.s.l., the nearest of them  
242 are at a distance of 200-500 m. The height of the weather vane is 11.3 m. The surface of the  
243 station plot is covered by hummocks, with moss, peat and individual bilberry and blueberry  
244 bushes. The area is surrounded by a sparse larch forest from the north, east and south. The depth  
245 of permafrost seasonal thaw reaches 1.5 m.

246 The meteorological station Kulu (670 m a.s.l., 1981-1991) was located on the right slope  
247 of the broad valley of the Kulu river. The slope has a western exposure (4-6 degrees). The height  
248 of the weather vane is 10.7 m. The area is surrounded by larch trees of 6-8 m height from the  
249 west, north and east. The soils are loamy with the inclusion of small gravel. The underlying  
250 surface consists of berry, grass and sphagnum mosses, sometimes bare soil. The depth of  
251 seasonal thawing of permafrost reaches 1.8-2 m.

252 In September 1992, the Kulu station (635 m a.s.l., 1992-1997) was moved to the  
253 residential building of the KWBS at the south-eastern part of the Kulu village. Residential and  
254 technical buildings are located around the meteorological plot. There was a road to the south of  
255 the station. The soil is marshy, covered with rubble and grass. This new location of the Kulu  
256 station is marked as Kulu2 station in the database.

257 The list of used devices and the accuracy of observations for each meteorological element  
258 is presented in the description files of the database.

259

260

### 3.2 Precipitation

261

262 In total, the precipitation was observed at 47 gauges within KWBS territory during  
263 different periods. Continuous daily all-year around precipitation data is available for the period  
264 1948-1997 for the gauge (#12) at meteorological station Nizhnyaya and for the gauge (#54) at  
265 meteorological station Kulu for 1981-1997. Four gauges have the data of daily totals during  
266 warm season for the period for more than 30 years and another 18 gauges for different shorter  
267 periods. Usually the start of daily observations at those gauges was initiated by the beginning of  
268 snowmelt period and lasted until the end of September. Monthly sums of precipitation were  
269 measured at 30 gauges, 10-days and 5-days sums – at 21 and 18 gauges respectively.

270 In 1948 precipitation gauge stations for measuring daily precipitation were equipped with  
271 the Nipher-shielded and Tretyakov-shielded precipitation gauges (Fig. 3A). In 1948-1958 the  
272 observations were carried out with both devices in parallel, after 1959 only Tretyakov gauges  
273 were used. Tretyakov precipitation gauges were also used for measurements precipitation totals  
274 in 5 and 10 days periods.

275 The other types of precipitation gauges applied at the KWBS are the Kosarev and ground  
276 rain gauge (GR-28) (Fig. 3B, 3C). GR-28 gauge with receiving area 500 cm<sup>2</sup> was installed into  
277 the special box several cm above the ground. GR-28 were usually installed on the 1<sup>st</sup> of June and  
278 dismantled on the 1<sup>st</sup> of September and used for rain measurements over the longer period,  
279 typically one month. Only those GR-28 which were installed at the soil evaporation plots  
280 measured precipitation every day. The Kosarev precipitation gauges were used for monthly  
281 precipitation measurements from the 1<sup>st</sup> of October to the 1<sup>st</sup> of May. Different precipitation  
282 gauges are shown at Fig. 5.

283 In 1960-1963 there was an attempt to register precipitation with automatic radio-  
284 precipitation gauges, but due to improper performance of the devices those observations were  
285 stopped.

286 In 1988, precipitation observations at the KWBS were carried out with 36 precipitation  
287 and rain gauges, distributed relatively evenly throughout the area and altitudinal zones. Average  
288 density of the precipitation network at that time accounted for 1.6 units per 1 km<sup>2</sup>.

289 For the period 1948-1968 precipitation data was published in Observation Reports as it  
was without any correction. Starting from 1969, all daily, 5-days and 10-days totals data from

290 Tretyakov rain gauges have been corrected for wetting losses according to Manual (1969). The  
291 correction value for precipitation event varied from 0.0 to 0.2 mm depending on the amount of  
292 observed precipitation and weather conditions. In average annual value of wetting losses  
293 correction did not exceed 5 % of total amount of precipitation, though in some years it could  
294 reach up to 9-10 %. In 1948-1983 monthly sums data obtained from GR-28 and Kosarev gauges  
295 were published without any correction. In 1984 wetting losses correction was introduced to GR-  
296 28 observations as well. In the database the precipitation data is presented in original form  
297 without any changes.

298 The analysis of water balance, climate change impact on river runoff or hydrological  
299 modelling requires accurate and reliable precipitation data. Arctic and mountainous regions are  
300 characterized by high bias of precipitation measurements because of significant amount of  
301 snowfall precipitation (WMO Report #67, 1998). Monthly estimates of this bias often vary from  
302 5% to 40%. Biases are larger in winter than in summer largely due to the deleterious effect of the  
303 wind on snowfall (Groisman et al., 2015). Three main methods of winter precipitation bias  
304 correction are suggested for the Tretyakov gauge which was the main type of precipitation gauge  
305 at KWBS. They are the WMO methodology (Yang and Goodison et al., 1995), Northern  
306 European countries method (Forland et al., 2000) and the approach developed by Golubev  
307 (WMO Report #67, 1998). The basis of all three methods for correcting measured precipitation  
308 is the dependence of the aerodynamic coefficient on wind speed, air temperature, precipitation  
309 type and wind protection.

310 In described database each precipitation gauge (if it was available) has the description of  
311 its location, altitude, slope exposure, vegetation type. Additional characteristic is the degree of  
312 protection characterized by five types of Schwer (1976) classification (Ia, Ib – protected; IIa, IIb  
313 – half-protected; III – open; IV – shore station). The database also contains the series of daily  
314 wind speed for three meteorological stations which combined with the information on location  
315 gauges can be used as a proxy for introducing bias corrections.

### 316 **3.3 Snow surveys**

317 Snow cover observations were started in 1950 and initially conducted at two catchments,  
318 at two meteorological plots and four typical squares. In 1959-1960 the number of catchments  
319 with snow surveys reached five. Up to 1971, snow surveys were conducted once per month  
320 starting in November and finishing in May at small catchments (the Severny, Yuzhny,  
321 Dogdemerny and Vstrecha) and once before spring snowmelt at the Kontaktovy – Nizhny. Since  
322 1972, the observations were reduced to one survey per year (usually at the end of April) for all  
323 watersheds. Table 2 shows the number of snow routes, their total length and number of  
324 measurement points, including their distribution among different landscapes of the catchments  
325 (Fig. 4). Snow depth was measured every 10 m, snow density – every 100 m at most of the  
326 watersheds, and 5 and 50 m respectively at the Morozova brook watershed.

327 Based on the data about measured snow height and snow weight with the account for  
328 landscape and elevation distribution average SWE for individual watersheds and landscapes was  
329 calculated and published in the Observation Reports.

330 Average depth of snow cover is presented with accuracy of 1 cm, density and SWE –  
331  $0.01 \text{ g cm}^{-3}$  and 1 mm respectively.

### 332 **3.4 Soil evaporation**

333 Three types of evaporimeters were used at the KWBS.

334 Evaporimeter GGI-500-50 (later modified to GGI-500-30) is a standard device for the  
335 soil evaporation measurements in Russia and former USSR (Fig. 5B). It consists of two  
336 cylindrical vessels, one inside the other, and a water-collecting vessel. The bottom of the inner  
337 cylinder has openings; the core sample is placed in it. The quantity of water evaporated is  
338 determined from the difference in weight of the sample as measured over two successive  
339 observation periods.

342 Rykachev evaporimeter was used for the soil evaporation measurements in 1950s. It  
343 consists of a sealed square rectangular box with a core sample (Fig. 5A). The box was placed  
344 inside another box installed in the ground. Since the inner box was sealed the device did not  
345 allow for water infiltration (Chebotarev, 1939).

346 The description of Gorshenin evaporimeter was not found.

347 From 1950 to 1953, five soil evaporation plots were opened at the sites with diverse  
348 underlying surfaces and different expositions and altitudes. The plots were equipped with the  
349 Rykachev and Gorshenin evaporimeters with evaporation area 1000 cm<sup>2</sup>. The observations until  
350 1958 are considered to be approximate due to the absence of accompanying rain gauges and  
351 scales of required accuracy.

352 From 1958 to 1966, the measurements were conducted at the soil evaporation plot,  
353 located near the Nizhnyaya weather station. The observations of evaporation were carried out  
354 with two evaporimeters GGI-500 and the Rykachev evaporimeter, precipitation – with a ground  
355 rain gauge.

356 Three soil evaporation sites were established in different landscapes – in the Vstrecha  
357 (1967), Morozova (1971) and Yuzhny (1977) brooks basins. The measurements were carried out  
358 with standard weighing evaporimeters GGI-500-50, which, due to the physical proximity of  
359 permafrost, were changed to GGI-500-30, meaning that their height was decreased to 30 cm.

360 The accuracy of observations was 0.1 mm (Konstantinov, 1968).

### 361 **3.5 Snow evaporation**

362 Snow evaporation observations were conducted at the KWBS from 1951, but only the  
363 data for the period 1968-1992 is considered to be consistent and reliable and is published in the  
364 described database. From 1968 to 1981, the observations were conducted with standard  
365 evaporimeter GGI-500-6 at weather plot Nizhnyaya. In 1981 the snow evaporation observations  
366 were transferred to the Kulu weather plot and lasted until 1992.

367 This measurement accounts for the snow evaporation on the ground. In the conditions of  
368 the KWBS with the larch as the main tree type, intercepted snow was only temporary  
369 phenomena because of cyclonic activity in January and February. Wind during the cyclones  
370 blow away snow from all trees except dwarf cedar that is under snow for the most part of the  
371 winter.  
372

373 Observations of evaporation from snow were made mainly in the fall (September,  
374 October) and in the spring (May – March). During winter months (January – February), the  
375 observations were made only until 1973, because the amount of evaporation from snow proved  
376 to be extremely insignificant for water balance. In the spring, during the intensive snowmelt,  
377 additional weighing of the evaporimeters was carried out every 3-6 hours. In the database, the  
378 evaporation values for night (20-8 hours) and daytime (8-20 hours) intervals are presented, only  
379 those values that correspond to a full 12-hour period of observations are published.

380 The accuracy of measurements is 0.01 mm.

### 381 **3.6 Thaw/freeze depth**

382 Since 1952, the observations on permafrost seasonal thaw dynamics were conducted at  
383 the KWBS. Danilin cryopedometers (frost tubes) were installed at permafrost observation sites  
384 (Snyder et al., 1971) which mostly were located in the approximate vicinity of Nizhnyaya and  
385 Verkhnyaya weather stations at the slopes with different aspects and landscapes.  
386

387 Cryopedometer designed by A.I. Danilin consists of a rubber tube 1 cm in external  
388 diameter and calibrated to an accuracy of 1 cm. The tube is filled with distilled water, closed at  
389 both ends and lowered into a casing (an ebonite pipe) installed in a borehole in the soil. In order  
390 to measure the depth of freezing, the rubber tube is taken from the casing and the lower end of  
391 the ice column in the tube is determined (Manual, 1973).



392 Despite the fact that permafrost observation sites were equipped with special bridges for  
393 observers to come close, eventually surface damage in the area where the device was installed  
394 began to influence thaw depth (Sushansky, 1988).

395 During 1952-1997 38 cryopedometers were functioning in total.

### 396 **3.7 Streamflow**

397 Runoff observations were carried out at 10 catchments: the creek Kontaktovy (the gauges  
398 Verkhny, Sredny, Nizhny), brooks Morozova, Yuzhny, Vstrecha, Vstrecha (the mouth),  
399 Dozhdemerny, Severny, Ugroza (Fig. 6). Key characteristics of the catchments are listed in  
400 Table 7.

401 All the water level gauges were equipped with «Valdai» water level recorders, as well as  
402 needle and hook water level gauges. In spring and autumn, when recorders did not work properly  
403 due to ice on the creeks, discharge was measured more frequently, every 4 hours. To prevent the  
404 recorder floats from freezing, the wells were heated with electric bulbs.

405 At the micro-watersheds of Morozova and Yuzhny brooks runoff was measured by  
406 means of a V-notch weir, at Severny brook – with a flow measuring flume.

407 In the database, mean daily values of streamflow are presented.

408 Originally daily discharges were published in Observation Reports in  $l\ s^{-1}$  with accuracy  
409 of three significant figures, but not more accurately than  $0.01\ l\ s^{-1}$  for runoff gauges equipped  
410 with weir or flume. For gauges with a natural channel for discharges more than  $1000\ l\ s^{-1}$  the  
411 rounding to three significant figures was performed, for discharges less than  $100\ l\ s^{-1}$  – to two  
412 significant figures, but not more precise than  $1\ l\ s^{-1}$ .

413 Small discharges which are less than  $0.05\ l\ s^{-1}$  for the gauges equipped with hydrometric  
414 facilities and less than  $0.5\ l\ s^{-1}$  for larger watersheds gauges were published in Observation  
415 Reports as 0.00 and 0, respectively. The periods with no runoff because of drying and freezing  
416 were marked with special symbols.

417 In the database, water discharges are converted to  $m^3\ s^{-1}$ , the number of significant figures  
418 was preserved but the values 0.00 and 0, as well as special symbols for freeze and dry periods  
419 are indicated as 0.

420 In 1984-1997 the information on the accuracy of discharge data was published for several  
421 runoff gauges In Observation Reports. It included the percentage of stage curve extrapolation in  
422 both directions which was published for one or several runoff periods per year depending on how  
423 many stage curves were applied. Also information about measured and estimated instant  
424 maximum and minimum discharges was available for the same period. Fig. 7 shows the boxplots  
425 of these characteristics for 7 runoff gauges for the period 1984-1997.

## 427 **4. Results**

### 428 **4.1 Meteorological variables and precipitation**

429 The climate of the study area is severely continental with harsh long winters and short but  
430 warm summers. Average annual temperature at the Nizhnyaya meteorological plot during 1949-  
431 1996 is  $-11.3\ ^\circ C$ . Mean monthly temperature in January was  $-33.6\ ^\circ C$ , in July  $+13.2\ ^\circ C$  (Fig. 8-  
432 9). The absolute minimum daily temperature of  $-53.0\ ^\circ C$  was registered in 1982 and the absolute  
433 maximum daily temperature was  $+22.8\ ^\circ C$  (1988). The period of negative air temperatures lasts  
434 from October to April, freeze-free period is, on average, 130 days long.

435 Air temperature inversions are observed at the KWBS. In December air temperature  
436 gradient reaches  $+2.0$ , in May it accounts for  $-0.5\ ^\circ C$  per 100 m of elevation respectively.

437 The average air humidity at the Nizhnyaya station is 3.6 mb, reaching its maximum and  
438 minimum values of 9.8 and 0.4 mb in July and December respectively.

439 Total cloudiness at the Nizhnyaya station has average annual value of 7.0 and does not  
440 change considerably through the year. Its minimum and maximum values are 5.9 and 8.0 points  
441 in March and July. Lower cloudiness dynamic is more significant, its mean monthly values  
442 changes from 0.5 to 4.7 in March to July with average value of 2.2 points.

443 Mean wind velocity is more than twice higher at Verkhnyaya station (1220 m a.s.l.) in  
444 comparison with Nizhnyaya station (850 m a.s.l.) and amount to 3.0 and 1.3 m s<sup>-1</sup> accordingly.  
445 Average monthly values changes from 0.83 in December to 1.70 in May at Nizhnaya, and from  
446 2.7 in November, February to 3.4 in May. Maximum daily wind speed amounted to 16 and 36 m  
447 s<sup>-1</sup> at Nizhnyaya and Verkhnyaya.

448 Precipitation at Nizhnyaya meteorological plot from 1969 (the year when wetting losses  
449 were introduced) to 1997 varied from 229 (1991) to 474 (1990) mm per year with mean value of  
450 362 mm. After introducing wetting losses correction to the period 1949-1968 and computing  
451 average mean amount from 1949 to 1997, its value decreased to 351 mm. Maximum and  
452 minimum monthly amount of precipitation at Nizhnyaya station was observed in July and March  
453 and correspond to 72 and 8 mm respectively for the whole period of observations 1949-1997  
454 (Fig. 8-9).

455 Maximum daily amount of precipitation at Nizhnyaya station was observed in June 1968  
456 reaching 48.1 mm. In average for the period of 50 years this statistic amounted to 26 mm.

#### 457 458 **4.2 Snow cover**

459 Stable snow cover at KWBS in average is formed in the first weeks of October, and melts  
460 in the third week of May (1949-1996). The KWBS area is characterized by an increase in the  
461 thickness of the snow cover due to the absence of thaws during the whole snow season. In the  
462 open treeless and watershed divide areas, the redistribution of snow pack due to wind blow is  
463 observed.

464 Average for the watershed mean, maximum and minimum snow water equivalent (SWE)  
465 before spring freshet estimated based on snow survey results at the Kontaktovy – Nizhny amount  
466 to 121, 213 (1985) and 59 (1964) mm respectively in the 1960-1997 period. In general, rocky  
467 talus and tundra bush landscape are characterized by lower SWE due to wind blowing. Much  
468 snow is accumulated in the forest landscape. However, at the Morozova brook watershed which  
469 is fully covered by rocky talus landscape, mean SWE before snowmelt was estimated as 161 mm  
470 with the maximum value of 298 mm observed in 1985 reaching in average 0.99 m snow height  
471 (Table 3, Table 4, Fig. 10).

#### 472 473 **4.3 Soil and snow evaporation**

474 The highest values of soil evaporation during the summer period were observed at the  
475 larch forest (site 9) and reached 136 mm. At a similar landscape (site 1), this value is lower, at  
476 119 mm, which indicates the influence of local factors. The lowest values of soil evaporation are  
477 104 mm at the plot located at dwarf cedar tree bush (site 7). In July, soil evaporation values  
478 range from 33 to 40 mm, depending on the landscape. In September, the contribution of  
479 evaporation decreases to 14-24 mm (Table 5).

480 Average values of annual soil evaporation were previously estimated by Semenova et al.  
481 (2013) and Lebedeva et al. (2017) based on partial KWBS data set as the following: 140 mm for  
482 larch and swampy sparse growth forest, 110 mm in dwarf cedar and alder shrubs of tundra belt,  
483 and about 70 mm for rocky talus.

484 The average values of evaporation from snow in mm per day are determined from  
485 measurement data as follows: January-February – -0.04; March – +0,09; April – +0,40; May –  
486 +0.74; September – +0,20; October – +0,01. Typical values of evaporation from snow for 1976-  
487 1977 are presented at Fig. 11.

#### 488 489 **4.4 Thaw/freeze depth**

490 The longest observation period is 33 continuous years (cryopedometer 17.5 located at the  
491 forest with bushes, maximum thawing is 130 cm, 1964-1997). The deepest values of thawing  
492 were observed in rocky talus landscape and can reach more than 240 cm. The shallowest values  
493 of thawing range from 60 to 70 cm at swampy forest. Thawing of soils at the forest zone varies  
494 in large ranges and depends on the location of the cryopedometer at a slope (Table 6, Fig. 12).

495 Lebedeva et al. (2014) reviewed the patterns of soil thaw/freeze processes and their  
496 impact on hydrological processes based on the analysis and modelling of the data at the  
497 cryopedometers in main landscapes of KWBS: rocky talus, mountain tundra with dwarf tree  
498 brush, moss-lichen cover and sparse-growth forest or larch forest.

#### 500 **4.5 Streamflow**

501 Flow at KWBS begins in May, most of it occurs in summer. At the outlet of KWBS  
502 Kontaktovy creek at Nizhny 33, 24 and 20 %% of flow occurs in June, July and August  
503 respectively. For the summer period, rainfall floods are typical (Fig. 13).

504 Small brooks freeze completely in October. Surface flow stops at the channel of  
505 Kontaktovy creek at Nizhny gauge in November, but there is the evidence that the river valley  
506 talik located lower than the Kontaktovy-Nizhny gauge, the runoff exists till the beginning of  
507 snowmelt, which is evidenced by continuous drop of levels in hydrogeological wells (Glotov,  
508 2002).

509 Annual runoff of the Kontaktovy stream basin with area 21.3 km<sup>2</sup> (average altitude 1070  
510 m) is 281 mm for the period 1948-1997, it increases with the elevation and at the Morozova  
511 catchment (mean elevation 1370 m, basin area 0.63 km<sup>2</sup>) reaches 453 mm (1969-1996). The flow  
512 from south-facing (Severny) and north-facing (Yuzhny) micro-watersheds with area of 0.38 and  
513 0.27 km<sup>2</sup> are 227 and 193 mm for the period 1960-1997 respectively.

514 Maximum daily discharge was observed in August, 1979 and amounted to 7.6 m<sup>3</sup>s<sup>-1</sup>  
515 (daily flow 30 mm) and 0.438 m<sup>3</sup>s<sup>-1</sup> (60 mm) at the Kontaktovy – Nizhny and at the Morozova  
516 watersheds respectively.

#### 517 **4.6 Changes of hydrometeorological elements in 50 years, 1948-1997**

518 The time series of flow characteristics and basic meteorological elements were evaluated  
519 for stationarity, in relation to presence of monotonic trends, with Mann-Kendall and Spearman  
520 rank-correlation tests, at the significance level of  $p < 0.05$  (Mann 1945; Kendall 1975). If both  
521 tests proved a trend, a serial correlation coefficient was tested. With the serial correlation  
522 coefficient  $r < 0.20$ , the trend was considered reliable. In the case of  $r \geq 0.20$ , to eliminate  
523 autocorrelation in the input series «trend-free pre-whitening» procedure (TFPW), described by  
524 Yue (Yue et al. 2002), was carried out. «Whitened» time-series were repeatedly tested with  
525 Mann-Kendall non-parametric test. Trend value was estimated with Theil-Sen estimator (Sen  
526 1968).

527  
528 The annual air temperature at Nizhnyaya station increased by 1.1 °C, positive trends are  
529 observed in March and October accounting for the rise of temperature by 2.3 and 3.3 °C  
530 correspondingly. Annual sum of precipitation has grown by 74 mm (21%). Maximum annual  
531 daily precipitation has also increased by 8 mm, or 31%.

532 The analysis of monthly and annual flow (mm) for the Kontaktovy creek – Nizhny from  
533 1948 to 1997 has revealed the changes of hydrological regime in those 50 years of runoff  
534 observations (Fig. 14). Positive trends of monthly flow are identified in May amounting to 29  
535 mm, or 92%, as well as in October (5.7 mm, 166%) and November (0.35 mm, 252%). The  
536 annual flow trend increased by 67 mm, or 24%. These results confirm general situation of  
537 increasing low flow which is observed in Siberia (Tananaev et al., 2016) and North America  
538 (Yang et al., 2015; St. Jacques and Sauchyn, 2009).

#### 539 **5. Water balance estimation**

540 The study of the water balance of watersheds is aimed at assessing the quantitative  
541 changes in its components, which makes it possible to study the main regularities in the runoff  
542 formation. In the northern regions, where climate change is more pronounced than in other parts  
543 of the world (Arctic Climate..., 2004) and standard hydrological network is shrinking  
544 (Shiklomanov et al, 2002), the assessment of the water balance and its future change is  
545 important.

546 The book Northern Research Basins Water Balance (2004) compiles the main results of  
547 water balance studies in the northern watersheds in last century such as Wolf Creek (Janowicz, et  
548 al., 2004), Kuparuk River (Lilly et al., 1998), Scotty Creek (Quinton et al., 2004), Nelka river  
549 (Vasilenko, 2004), including Kontaktovy Creek of KWBS (Zhuravin, 2004).

550 In this section the results of rough estimation of mean annual water balance for three  
551 micro-watersheds with area less than 1 km<sup>2</sup> and representative for main landscapes of studied  
552 territory (Severny, Yuzhny, Morozova) are presented and compared with the assessments made  
553 by other authors.

554 The estimation of water balance for the whole watershed of Kontaktovy cr. requires  
555 special analysis and does not lie in the scope of this paper; only the results of other authors are  
556 shortly summarized.

557 A general form of water balance equation (in mm) is used as the following:

$$558 \text{SWE} + P_{\text{rain}} + \Delta P_{\text{corr}} - ET - E_{\text{snow}} - R = \eta. \quad (1)$$

559 Here SWE is average value of snow water equivalent before spring freshet from snow  
560 surveys data. For Morozova watershed SWE is increased by 36 mm which is the average  
561 precipitation in May at ground rain gauge #42 (1400 m a.s.l.).

562  $P_{\text{rain}}$  is total sum of daily rainfall precipitation during warm period from the rain gauges  
563 located within studied watersheds. The data before 1969 was corrected for wetting losses  
564 according to (Manual for hydrometeorological stations ..., 1969). For Severny and Yuzhny  
565 watersheds rainfall precipitation  $P_{\text{rain}}$  is calculated as total sum of precipitation in May-August  
566 period and half of average precipitation in September accounting for air temperature transition  
567 from positive to negative which usually occurs in the mid of September at rain gauges #5 (880 m  
568 a.s.l.) and #20 (900 m a.s.l.) respectively. For Morozova watershed which is in average 300 m  
569 higher than Severny and Yuzhny ones,  $P_{\text{rain}}$  consists of sum precipitation for the period from  
570 June to August estimated based on the data from daily precipitation data of rain gauge #38 (1200  
571 m a.s.l.).

572  $\Delta P_{\text{corr}}$  is wind and evaporation correction of warm period rainfall precipitation calculated  
573 using the wind speed data from Nizhnyaya and Verkhnyaya stations based on the  
574 recommendations of Manual for hydrometeorological stations ..., 1969).

575 ET, soil evapotranspiration, is calculated using average annual values for main  
576 landscapes of KWBS estimated by Semenova et al. (2013) and Lebedeva et al. (2017) with the  
577 account of their distribution across the studied watersheds.

578 Evaporation from snow  $E_{\text{snow}}$  is assessed as the following:

$$579 E_{\text{snow}} = 0.40 \cdot d_{\text{Apr}} + 0.74 \cdot d_{\text{May}} \quad (2)$$

580 where  $d_{\text{Apr}}$  and  $d_{\text{May}}$  are average numbers of days in April and May between the date of  
581 maximum SWE and its full melt; 0.40 and 0.74 are average values of snow evaporation in April  
582 and May estimated based on observed data.

583 R is observed runoff; and  $\eta$  is an error term.

584 Possible members of water balance equation such as the changes in surface storage  
585 (lakes, wetlands, reservoirs, channels, etc.), subsurface storage of groundwater and the storage of  
586 unsaturated zone are estimated as zero and not accounted for long-term annual estimation.

587 Table 8 shows the distribution of water balance components for three small watersheds.  
588 All main components of water balance were assessed independently on the basis of data of direct  
589 observations. At two watersheds, the water balance discrepancy calculated as the difference  
590 between precipitation, runoff and total evaporation, is positive and varies from 43 to 57 mm  
591 which is about 11 and 14 % of calculated total precipitation. The water balance error at the  
592 Morozova watershed, which is completely formed of rocky talus, is negative and amounted to 68  
593 mm or 14% from total precipitation. Though we did not use for calculations the data of solid  
594 precipitation, Sushansky (2002) assessed snow under-catch at Morozova watershed as 25-30 mm  
595 per year. Zhuravin (2004) mentioned that significant errors are possible at the sampling depth of  
596 snowpack profile in the areas covered with the Siberian dwarf-pine which is covered by snow  
597 during winter. He assessed the error of SWE estimation in such areas as 15% of the measured

598 value. We would suggest that measuring SWE at rocky talus watershed where some areas are  
599 covered by boulders could cause the error of compared magnitude.

600 Estimated runoff coefficient amounts to 56, 51 and 95 % of precipitation for Severny,  
601 Yuzhny and Morozova watersheds respectively. Considering high runoff coefficient for rocky  
602 talus landscape, large proportion of the KWBS area (34%) covered by this type of underlying  
603 surface (Fig. 2B) and significant uncertainty of water balance estimation for Morozova Creek  
604 given the availability of observed data, correct assessment of water balance for larger areas  
605 seems rather complicated.

606 Table 8 presents the comparison of water balance calculations for three micro-watersheds  
607 of KWBS performed by different authors. While in this research SWE from snow surveys was  
608 taken as the estimate of winter precipitation, both – Lebedeva et al. (2017) and Zhuravin (2004)  
609 used observed precipitation data for assessing this component of water balance. The estimates of  
610 total precipitation vary due to different correction procedure applied (or not applied) by different  
611 authors. One may see that though all the authors used the same observed data on evaporation, its  
612 interpretation has provided the variation of results (Table 8). Also low closure error does not  
613 always confirm the correctness of estimation as, for example, Lebedeva et al. (2017) did not  
614 apply any bias correction to precipitation neither accessed the value of snow evaporation.

615 For the main KWBS watershed, the Kontakovy Creek (21.3 km<sup>2</sup>), Zhuravin (2004)  
616 provided the following estimates of water balance for the period 1970-1985: precipitation – 405  
617 mm, evaporation – 137 mm, runoff – 296 mm, discrepancy error - -28 mm (7%). Lebedeva et al.  
618 (2017) calculated the same values for 1949-1990 as 390, 281, 114 and -5 mm (-1%) respectively.

619 Presented results confirm that accurate numerical estimation of water balance elements  
620 even using available measurements is complicated (Kane and Yang, 2004) and subjective.  
621 Therefore it is important to make raw observational data available for scientific community as  
622 described in this paper.

623

## 624 **6. Data availability**

625 All data presented in this paper are available from the “PANGAEA. Data Publisher for  
626 Earth & Environmental Science” (see Makarieva et al., 2017,  
627 <https://doi.pangaea.de/10.1594/PANGAEA.881731>).

628 The directory includes 12 elements:

- 629 1. daily precipitation time series at 25 gauges within Kolyma Water-Balance Station  
630 (KWBS), 1948-1997;
- 631 2. daily runoff time series at ten gauges of KWBS, 1948-1997;
- 632 3. evaporation time series at 9 sites at KWBS, 1950-1997;
- 633 4. meteorological observations at three sites of KWBS, including the values of air  
634 temperature, water vapour pressure, vapour pressure deficit, atmospheric pressure, wind  
635 speed, low and total cloud amount, and surface temperature, 1948-1997;
- 636 5. monthly precipitation time series at 30 gauges within KWBS, 1948-1997;
- 637 6. precipitation (10 day sum) time series at 21 gauges within KWBS, 1962-1997;
- 638 7. precipitation (5 day sum) time series at 14 gauges within KWBS, 1966-1997;
- 639 8. snow survey line characteristics at KWBS, 1959-1997;
- 640 9. snow survey time series at different sites and landscapes within KWBS, 1950-1997;
- 641 10. soil temperature time series at the Nizhnyaya meteorological station at KWBS, 1974-  
642 1981;
- 643 11. thaw depth and snow height time series at different sites of KWBS, 1954-1997;
- 644 12. snow evaporation time series at two sites of KWBS, 1968-1992.

645

## 646 **7. The future of the KWBS**

647 In summer 2016, with the assistance of Melnikov Permafrost Institute of Siberian Branch  
648 of Russian Academy of Science, a group of specialists, consisting of representatives of different

649 scientific institutions, conducted a reconnaissance survey of the KWBS in order to find out if it  
650 was possible to carry out scientific research and stationary monitoring of permafrost and  
651 hydrological processes at the station. Despite rather difficult logistic access to the KWBS, it was  
652 considered possible to organize accommodation and provision of the station for the period of  
653 summer expeditions. At first, the main goal of research resumption at the station would be a  
654 renewal of regular observations of runoff, meteorological elements and active layer dynamics at  
655 three small catchments (Morozova, Yuzhny, Severny) and the KWBS main-stream outlet  
656 (Nizhny gauge) using advanced equipment with automatic data recording. As a result, some  
657 unique runoff observations series – over 60 years long – will be continued, which will allow for  
658 evaluation of climatic impact on permafrost and provide a scientifically based forecast on current  
659 and future climate change impact on the hydrological regime.

660 During short 3-4 week field trips at the beginning and at the end of the warm (and  
661 hydrological) season, it would be also possible to study specific processes of runoff formation  
662 under permafrost conditions. Slope runoff occurs unevenly, and is concentrated in particular  
663 areas, the drainage zones or preferential path flows. Reconnaissance surveys of the Kontaktovy  
664 creek catchment at the KWBS territory, 2016, revealed that there are several types of such zones  
665 of slope runoff concentration. Another possible scientific task is to evaluate the role of cryogenic  
666 redistribution of runoff, which regularly occurs due to ice freezing-melting in coarse-grained  
667 slope deposits. Similar studies have already been carried out in mountain regions of permafrost,  
668 including the KWBS (Sushansky, 1999; Bantsekina, 2001; Bantsekina, 2002; Boyarintsev et al.,  
669 2006). Another research issue is the study of floodplain taliks (Mikhaylov, 2013) and aufeises  
670 (Alexeev, 2016) and their impact on hydrological processes in the mountainous part of the  
671 continuous permafrost zone. Field trips for a limited group of scientists could be covered with  
672 relatively modest financial support through research grants. In the future, the aim for the KWBS  
673 is to get back its status of a research station, to receive state funding, obtain sponsor support from  
674 gold mining companies of the Magadan region and become an international center for complex  
675 studies in the field of permafrost hydrology.

676 The KWBS is situated in the region where monitoring of natural processes is extremely  
677 sparse. From 1986 to 1999, the number of hydrological gauge stations in Far-East parts of  
678 Siberia decreased by 73% (Shiklomanov et al., 2002). Resumption of water balance observations  
679 and organization of complex research of permafrost, climate, and landscape, hydrological and  
680 hydrogeological processes based on data collected at the KWBS would make it possible to get  
681 new data, representative for the understudied territory of the Arctic in the context of  
682 environmental changes. Considering the insufficient knowledge about this territory and available  
683 long-term data, the KWBS has the prospect to become a highly demanded complex international  
684 center for testing natural process models at different scales – from point to regional, – validation  
685 of remote sensing products and a place for multidisciplinary field research.

686 More than 20% of the Northern Hemisphere is covered by permafrost. Three of the four  
687 largest rivers of the Arctic Ocean basin flow through Siberia. Many studies highlight ongoing  
688 and intensifying changes of water, sediment and chemical fluxes at all spatial scales but  
689 mechanisms of changes and future projections are highly uncertain. There are no research  
690 centers that could conduct focused studies of hydrological processes at catchments in the  
691 permafrost region in Russia. The KWBS incorporation into the international network for  
692 monitoring natural processes in cold regions (Interact, SAON, CALM, GTN-P, etc.) could  
693 significantly enhance international cooperation for better understanding of cold-region hydrology  
694 for the last 70 years, present and future.

695 Nowadays, the resumption of continuous observations and research at the Kolyma station  
696 appears to be a critical task due to increased interest in the natural processes of the Arctic region.  
697 Present-day data, following the KWBS long-term observations series, could become a valuable  
698 indicator of climate change and a basis for studying its impact on the state of the permafrost and  
699 its associated hydrological regime. Currently, as the station infrastructure is still partly intact,  
700 and some of the specialists who worked at the KWBS are still active and willing to help, it is

701 necessary to gain attention and support from the Russian and international scientific community  
702 regarding the renewal of the KWBS before it is too late.

## 703 **8. Conclusions**

704 The presented dataset describes water balance, hydrometeorological and permafrost  
705 related components at small research watershed in mountainous permafrost zone of North-East  
706 Russia, the Kolyma water-Balance Station (KWBS). It includes 50 years of continuous daily  
707 meteorological and streamflow data for main meteorological plot and runoff gauge of KWBS  
708 and daily data of shorter periods for another two meteorological sites and 9 runoff gauges.  
709 Meteorological data includes values of air temperature, water vapour pressure, vapour pressure  
710 deficit, atmospheric pressure, wind speed, low and total cloud amount, and surface temperature.  
711 The dataset also includes all-year daily, warm period daily, 5-, 10-days and monthly sums for 47  
712 (in total) precipitation gauges within KWBS territory for different time spans over the period  
713 1948-1997. It also contains soil evaporation data from different landscapes, snow evaporation  
714 series from two sites; snow surveys results for different watersheds within KWBS, as well as  
715 thaw/freeze depths at more than 30 observational sites.

716 Based on the observation data annual water balance of three micro-watersheds (0.27 -  
717 0.69 km<sup>2</sup>) was estimated for the whole period of observations. Estimated runoff coefficients  
718 varied from 51-56 % at to 95 % in rocky talus. Assessment of water balance at larger scale is  
719 complicated due to significant uncertainty of water balance estimation for rocky talus which  
720 occupies about the third of the KWBS area.

721 Analysis of flow and meteorological data revealed general warming and the changes of  
722 water balance components in 1948-1997. The increase of annual air temperature amounted to 1.1  
723 °C, annual precipitation has grown by 21%. Annual flow increased by 24%, positive trends were  
724 also determined in May (92%), October (166%), November (252%).

725 The dataset is important because it characterizes the natural settings, which, on the one  
726 hand, are nearly ungauged, and on the other hand, are representative for the vast mountainous  
727 territory of Eastern Siberia and North-East Russia. It is unique because it combines water  
728 balance, hydrological and permafrost data which allow for studying permafrost hydrology  
729 interaction processes within the range of all scientific issues, from models development to  
730 climate change impacts research.

731

## 732 **9. Author contribution**

733 O. Makarieva and N. Nesterova digitized and prepared the dataset for publication with  
734 assistance from L. Lebedeva and S. Sushansky. The data were collected in 1948-1997 by  
735 Hydrometeorological Service of USSR and Russia and published in Observation Reports (1959-  
736 1997).

737

## 738 **10. Acknowledgements**

739 Authors are grateful to two anonymous reviewers, Wolf-Dietrich Marchand and Pedro  
740 Restrepo for valuable input. Their comments allowed for better understanding of described data  
741 and inspire for the continuation of our fight for the restoration of the Kolyma Water-Balance  
742 station. We also thank David Post for English language correction.

## 743 **11. References**

744 Arctic Climate Impact Assessment (2004) Arctic Climate Impact Assessment. Cambridge  
745 University Press, ISBN 0-521-61778-2

746 Arctic Observatory Network (AON). International Study of Carbon, Water, and Energy Balances  
747 in the Terrestrial Arctic. <http://aon.iab.uaf.edu>, Accessed January 8, 2018.

- 748 Arp C., Stuefer S.L. (2017) Hydrological and meteorological data from the North Slope of  
749 Alaska. University of Alaska Fairbanks, Water and Environmental Research  
750 Center. <http://ine.uaf.edu/werc/werc-projects/teon/current-stations/franklin-bluffs/>. Accessed  
751 April 17, 2017.
- 752 Alekseev V.P. (2016) Long-term variability of the spring taryn-aufeises. *Ice and Snow*, 56(1),  
753 73-92. DOI:10.15356/2076-6734-2016-1-73-92
- 754 Alexeev V.P., Boyarintsev Ye.L., Gopchenko Ye.D., Serbov N.G., Zavaliy N.V. (2011) The  
755 mechanism of cryogenic runoff control at the formation of water balance of small mountain  
756 rivers in the area of permafrost rocks. *Ukrainian hydrometeorological Journal*, 8, 182-194 (in  
757 Russian).
- 758 Bantsekina T.V. (2003) Peculiarities of hydrothermal regime of seasonal thawing layer in  
759 coarsely clastic rocks during spring summer period (with an example of Upper Kolyma  
760 highland). PhD thesis, Melnikov Permafrost Institute, Yakutsk, 137pp (in Russian).
- 761 Bantsekina T.V. (2002) Temperature regime and dynamics of icing of coarse-grained slope  
762 deposits without filling during spring-summer period (case study of the Kontaktovy creek).  
763 *Kolyma*, 4, 9-13. (in Russian)
- 764 Bantsekina T.V. (2001) Dynamics of coarse-grained slope deposits icing during spring thawing.  
765 *Kolyma*, 2, 28-31 (in Russian).
- 766 Bantsekina, TV, Mikhailov, V.M. (2009) To the assessment of the role of intra-soil condensation  
767 of water vapor in the formation of the thermal and water regimes of large sediments, *Earth's*  
768 *Cryosphere*, XIII, 1, 40-45
- 769 Boyarintsev, E.L (1980) Estimation of the losses of spring floods in the Upper Kolyma basin,  
770 *Meteorology, Climatology and Hydrology*, 16, 19-24.
- 771 Boyarintsev E.L. (1988) Azonal factors of rainfall runoff formation in the territory of Kolyma  
772 WBS. *Proceedings DVNIGMI*, 135, 67-93, (in Russian).
- 773 Boyarintsev E.L., Gopchenko E.D., Serbs N.G., Legostaev G.P. (1991) Concerning the  
774 condensation of air vapors in the active layer of permafrost. M., Dep. in the IC VNIIGMI-WDC  
775 16.01.91, 1046 GM 91. P. 17, (in Russian).
- 776 Boyarintsev E.L., Gopchenko E.D. et al. (1992) Summer period water balance of small mountain  
777 catchments of the permafrost and its calculation. *Meteorology, climatology and hydrology*, 27,  
778 105-116.
- 779 Boyarintsev E.L., Nikolaev S.N. (1986) Groundwater runoff from small watersheds of  
780 permafrost zone // *Materials of scientific. Conf. on the problems of hydrology of the rivers of the*  
781 *BAM zone and the Far East*. L, *Gidrometeoizdat*, 297-307 (in Russian).
- 782 Boyarintsev E.L., Serbov N.G., Popova N.I. (2006) Formation of the water balance of the spring  
783 floods of the small mountain watersheds of Upper Kolyma (based on materials from the Kolyma  
784 Water-Balance Station) - *Bulletin of the North-Eastern Scientific Center, Far-Eastern Branch of*  
785 *the Russian Academy of Sciences*, 4, 12-19 (in Russian).



- 786 Changing Cold Regions Network project. <http://www.ccrnetwork.ca>. Accessed January 8, 2018.
- 787 Chebotarev, N.P. (1939) Flow and hydrological calculations / Ed. B.V. Polyakova. - M.:  
788 Gidrometeoizdat. 294 pp.
- 789 Forland E.Y., Allerup P., et al. (1996) Manual for operation correction of Nordic Precipitation  
790 data. - DNMI-Klima Report, vol. 24/96, 66 p.
- 791 Glotov V.E. (2002) Ground water of the Kontaktovy Creek watershed as a factor of general  
792 drainage system formation. In: Glotov V, Ukhov N (eds.) Factors affecting the formation of a  
793 general drainage system of minor mountain rivers in sub-arctic areas. SVKNII DVO RAN.  
794 Magadan, 102-141 (in Russian).
- 795 Groisman P.Ya., Bogdanova E.G., Alexeev V.A., Cherry J.E., Bulygina O.N. (2014) Impact of  
796 snowfall measurement deficiencies on quantification of precipitation and its trends over Northern  
797 Eurasia *Ice and Snow*, 2(126), 29-43.
- 798 Gusev E.M., Nasonova O.N., Dzhogan L.Ya. (2006) The Simulation of Runoff from Small  
799 Catchments in the Permafrost Zone by the SWAP Model. *Water Resources*, 33, 2, 133-145.
- 800 Hobbie, J.E., Shaver, G.R., Laundre, J., Slavik, K., Deegan, L.A., O'Brien, J., Oberbauer, S.,  
801 MacIntyre, S. (2003) Climate forcing at the arctic LTER site. In: Greenland D, editor. *Climate  
802 variability and ecosystem response at long-term ecological research (LTER) sites*. New York:  
803 Oxford University Press. pp. 74–91
- 804 Hinzman, L.D., N. Ishikawa, K. Yoshikawa, W.R. Bolton, K.C. Petrone (2002) Hydrologic  
805 Studies in Caribou Poker Creeks Research Watershed in Support of Long term Ecological  
806 Research. *Eurasian Journal of Forest Research*. 5-2:67-71.
- 807 Improving Processes & Parameterization for Prediction in Cold Regions Hydrology, Centre for  
808 Hydrology, University of Saskatchewan, Saskatoon, Saskatchewan, Canada. Accessed January 8,  
809 2018.
- 810 Informational letter #2 (1988) 40 years anniversary of the Kolyma Water Balance Station.  
811 Kolymskiy Territorial Office on Hydrometeorology, Magadan (in Russian).
- 812 Janowicz, J. R., Hedstrom, N., Pomeroy J., Granger, R., Carey, S. (2004) Wolf Creek Research  
813 Basin water balance studies. In *Proceedings: U.S. National Science Foundation / Northern  
814 Research Basins, Workshop on Circumpolar Water Balance*. Victoria, B.C., Canada, 15-19  
815 March, 2004
- 816 Kane, D. L., Hinzman, L. (2009) Upper Kuparuk River, Imnavait Creek, Roche Moutonnee  
817 Creek, and Putuligayuk River Hydro-Meteorologic Datasets. Fairbanks: University of Alaska  
818 Fairbanks, Water and Environmental Research Center.
- 819 Kane, D.L., Yang, D. (2004) Overview of water balance determinations for high latitude  
820 watersheds. In: *Northern Research Basins Water Balance*, King DL, Yang D (Eds), IAHS publ.  
821 290, 195-204.
- 822 Kendall M. G. (1975) *Rank Correlation Methods*, Griffin, London.

- 823 Korolev, Yu. B. (1984) Mapping of the vegetation cover in connection with an assessment of its  
824 hydrological role (by the example of the Upper Kolyma). PhD thesis for candidate of biological  
825 science, Magadan University, Yakutia, 231 p. (in Russian)
- 826 Konstantinov, A. R. (1968) The evaporation in nature. Gidrometeoizdat, Leningrad, 1968, 532 p.  
827 (in Russian)
- 828 Kuchment L.S., Gelfan A.N., Demidov A.I. (2000) A Model of Runoff Formation on  
829 Watersheds in the Permafrost Zone: Case Study of the Upper Kolyma River. *Water Resources*,  
830 27, 4, 435-444.
- 831 Kuznetsov A.S., Nasibulin S.S., Ipatieva A.I. (1969) The first results of the study of water  
832 balance on the rivers of the Upper Kolyma basin // Collection of works of the Magadan  
833 Hydrometeorological Observatory, 2, Magadan, 98-121, (in Russian).
- 834 Laudon H, Spence C, Buttle J, Carey SK, McDonnell JJ, McNamara JP, Soulsby C, Tetzlaff D.  
835 (2017) Saving northern high-latitude catchments. *Nature Geoscience*, 10, 324-325. doi:  
836 10.1038/ngeo2947.
- 837 Lebedeva L.S., Semenova O.M., Vinogradova T.A. (2015) Hydrological modeling: seasonal  
838 thaw depths in different landscapes of the Kolyma Water Balance Station (Part 2). *Earth's*  
839 *Cryosphere*, XIX, 2, 35-44.
- 840 Lebedeva L.S., Makarieva O.M., Vinogradova T.A. (2017) Spatial variability of the water  
841 balance elements in mountain catchments in the North-East Russia (case study of the Kolyma  
842 Water Balance Station). *Meteorology and Hydrology*, 4, 90-101 (in Russian).
- 843 Lilly, E. K., Kane, D. L., Gieck, R. E. & Hinzman, L. D. (1998) Annual water balance for three  
844 nested watersheds on the north slope of Alaska. In: *Permafrost (Proc. seventh Int. Conf.,*  
845 *Yellowknife, Canada)*, 669-674.
- 846 Mann H. B. 1945 Nonparametric tests against trend, *Econometrica*, 13, 245–259.
- 847 Manual for hydrometeorological stations for corrections of observed values of precipitation  
848 (1969). L., Gidrometeoizdat, 30 p. (in Russian)
- 849 Manual of the water balance stations (1973). L., Gidrometeoizdat, 308 p. (in Russian)
- 850 Mikhaylov V.M. (2013) Floodplain taliks of North-East of Russia. *Novosibirsk, Geo*, 244 p. (in  
851 Russian)
- 852 Nasybulin, P.S. (1976) The representativity of runoff characteristics at the Kolyma Water  
853 Balance Station for the upper Kolyma area. *Natural resources of the USSR North-East.*  
854 *Vladivostok, AN DVIS IBPS*, 32-41 (in Russian)
- 855 Northern Research Basins Water Balance (2004) Proceedings of a workshop held at Victoria,  
856 Canada. IAHS Publ. 290
- 857 NPR-A Hydrology, Water and Environmental Research Centre. <http://ine.uaf.edu>. Accessed  
858 January 8, 2018.

859 Observation Reports. Kolyma Water Balance Station, 1948–1997. Issues 1–40, 1959–1998,  
860 Kolyma UGKS, Magadan (in Russian)

861 Pacific Northwest Natural Areas Network [PNNAN] (2014) Fish Creek Research Natural Area.  
862 [http://www.fsl.orst.edu/rna/sites/Fish\\_Creek\\_Rim.html](http://www.fsl.orst.edu/rna/sites/Fish_Creek_Rim.html). (26 September 2014)

863 Peterson, B. J., R. M. Holmes, J. W. McClelland, C. J. Vörösmarty, R. B. Lammers, A. I.  
864 Shiklomanov, I. A. Shiklomanov, and S. Rahmstorf (2002) Increasing river discharge to the  
865 Arctic Ocean, *Science*, 298, 2171–2173.

866 Pietroniro A., Fortin V., Kouwen N., Neal C., Turcotte R., Davison B., Versegny D., Soulis E.  
867 D., Caldwell R., Evora N., and Pellerin P. (2007). Development of the MESH modelling system  
868 for hydrological ensemble forecasting of the Laurentian Great Lakes at the regional  
869 scale. *Hydrol. Earth Syst. Sci.*, 11: pp 1279-1294

870 Pomeroy, J. W., Gray, D. M., Brown, T., Hedstrom, N. R., Quinton, W. L., Granger, R. J. and  
871 Carey, S. K. (2007) The cold regions hydrological model: a platform for basing process  
872 representation and model structure on physical evidence. *Hydrol. Process.*, 21: 2650–2667.  
873 doi:10.1002/hyp.6787

874 Quinton, W. L., Hayashi, M., Wright, N. (2004) The Water Balance of Wetland-Dominated  
875 Permafrost Basins: A White Paper Submitted to the Water Balance Workshop. In *Proceedings:*  
876 *U.S. National Science Foundation / Northern Research Basins, Workshop on Circumpolar Water*  
877 *Balance*. Victoria, B.C., Canada, 15-19 March, 2004, p. 118-139.

878 Reynuk I.T. (1959) Condensation in active layer of permafrost. *Proceedings of All Union*  
879 *Scientific and Research Institute of Gold and Rare Metals*. Issue 13 (permafrost studies), 1-24.

880 Semenova, O., Lebedeva, L., Vinogradov, Yu. (2013) Simulation of subsurface heat and water  
881 dynamics, and runoff generation in mountainous permafrost conditions, in the Upper Kolyma  
882 River basin, Russia. *Hydrogeol. J.* 21 (1), 107–119, doi:10.1007/s10040-012-0936-1

883 Sen P. K. (1968) Estimates of the regression coefficient based on Kendall's tau, *Journal of the*  
884 *American Statistical Association*, 63, 1379–1389.

885 Shiklomanov, A. I., R. B. Lammers, and C. J. Vörösmarty (2002) Widespread decline in  
886 hydrological monitoring threatens Pan-Arctic Research, *Eos Trans. AGU*, 83(2), 13–17,  
887 doi:10.1029/2002EO000007.

888 Shmakin, A.B. (1998) The updated version of SPONSOR land surface scheme: PILPS  
889 influenced improvements. *Glob. Plan. Change*, 19, 49-62.

890 Shver C.A. (1976) Precipitation at the territory of the USSR. L., *Gidrometeoizdat*, 302 p. (in  
891 Russian)

892 Slaughter C.W., Billelo M.A. (1977) Kolyma Water Balance Station, Magadan oblast, Northeast  
893 U.S.S.R.: United Station - Soviet Scientific Exchange Visit, Special Report 77-155, Army Gold  
894 Regions Research and Engineering Laboratory. Hanover, 66.

- 895 Snyder F, Sokolov A, Szesztay K. (1971) Flood Studies: An International Guide for Collection  
896 and Processing of Data. Unesco: Paris; 52 pp.
- 897 St. Jacques, J. M., Sauchyn, D. J. (2009) Increasing winter baseflow and mean annual  
898 streamflow from possible permafrost thawing in the Northwest Territories, Canada, *Geophys.*  
899 *Res. Lett.*, 36, L01401, doi:10.1029/2008GL035822.
- 900 Sushchansky, S.I. (1988) The first interim report of research at KWBS. State Committee of the  
901 USSR on Hydrometeorology. Kolyma Department of Hydrometeorology. -Magadan, 99 p.
- 902 Sushchansky, S.I. (1989) The second interim report of research at KWBS. State Committee of  
903 the USSR on Hydrometeorology. Kolyma Department of Hydrometeorology. - Magadan, 114 p.
- 904 Sushchansky, S.I. (1990) The third interim report of research at KWBS. State Committee of the  
905 USSR on Hydrometeorology. Kolyma Department of Hydrometeorology. - Magadan, 140 p.
- 906 Sushchansky, S.I. (1990) The final report of research at KWBS. State Committee of the USSR  
907 on Hydrometeorology. Kolyma Department of Hydrometeorology. - Magadan, 109 p.
- 908 Sushchansky S.I. (1999) Peculiarities of water balance elements in the Morozova Creek catchment.  
909 *Kolyma*, 1, 33-40 (in Russian).
- 910 Sushchansky S.I. (2002) History of creation, methods, objects and some results of studies in the  
911 Kolyma water balance station. In: Glotov V, Ukhov N (eds.) Factors affecting the formation of a  
912 general drainage system of minor mountain rivers in sub-arctic areas. SVKNII DVO RAN:  
913 Magadan, 18-35.
- 914 Tananaev, N. I., O. M. Makarieva, and L. S. Lebedeva (2016) Trends in annual and extreme  
915 flows in the Lena River basin, Northern Eurasia, *Geophys. Res. Lett.*, 43,  
916 doi:10.1002/2016GL070796
- 917 Tikhmenev P.Ye. (2008) Peculiarities of succession process in disturbed lands of the Kolyma  
918 river basin. Natural-resources potential, ecology and sustainable development of Russian  
919 regions: Collected works VI International scientific-practical Conf. Penza: PGAU, 273-275.
- 920 Vasilenko, N. (2004) Water balance of small Russian catchments in the southern mountainous  
921 Taiga Zone: "Mogot" case study. In Proceedings: U.S. National Science Foundation / Northern  
922 Research Basins, Workshop on Circumpolar Water Balance. Victoria, B.C., Canada, 15-19  
923 March, 2004
- 924 Versegny, D. L. (1991) CLASS-A Canadian Land Surface Scheme for GCMs: I. Soil Model,  
925 *International Journal of Climatology IJCLEU*, vol. p 111-133, p. 44
- 926 Vinogradov, Yu.B., Semenova, O.M., Vinogradova, T.A. (2015) Hydrological modeling: heat  
927 dynamics in a soil profile (Part 1). *Earth's Cryosphere (Kriosfera Zemli)* XIX (1), 11–21.
- 928 Walker, D.A., Walker, M.D. (1996) Terrain and vegetation of the Innvait Creek  
929 Watershed. J.F. Reynolds, J.D. Tenhunen (eds.) *Landscape Function: Implications for Ecosystem*  
930 *Disturbance, a Case Study in Arctic Tundra* (pp. 73-108). Springer-Verlag: New York, NY

931 WMO, 1998: Instruments and Observing Methods, Report No. 67. WMO Solid Precipitation  
932 Measurement Intercomparison. Final Report. WMO/TD-No.872, 212 p.

933 Yang D., Goodison B.E., et al. (1995) Accuracy of Tretyakov Precipitation gauge: Results of  
934 WMO Intercomparison. - Hydrological Processes, vol. 9, pp. 877-895

935 Yang, D., X. Shi, and P. Marsh (2015), Variability and extreme of Mackenzie River daily  
936 discharge during 1973–2011, Quat. Int., 380–381, 159–168, doi:10.1016/j.quaint.2014.09.023

937 Yarie, J., Viereck, L., Cleve, K., Adams, P. (1998) Flooding and Ecosystem Dynamics along  
938 the Tanana River. 48 (9), 690 - 695

939 Yeh, K-S., Cote, J., Gravel, S., Methot, A., Patoine, A., Roch, M., Staniforth, A. (2002) The  
940 CMC–MRB global environmental multiscale (GEM) model: Part III – Nonhydrostatic  
941 formulation. Mon. Weather Rev. 130: 339–356.

942 Yue S., P. Pilon, Cavadias, G. (2002) Power of the Mann–Kendall and Spearman’s rho tests for  
943 detecting monotonic trends in hydrological series, Journal of Hydrology, 259, 254–271.

944 Zhuravin S. (2004) Features of water balance for small mountainous basins in East Siberia:  
945 Kolyma Water Balance Station case study. IAHS Publ 290, IAHS, Wallingford, UK, 28–40.

946

947 Table 1 List of meteorological observation data

| Station                 | Nizhnyaya | Verkhnyaya | Kulu                   | Kulu2  |
|-------------------------|-----------|------------|------------------------|--------|
| Latitude                | 61.85     | 61.86      | 61.88                  | 61.88  |
| Longitude               | 147.67    | 147.61     | 147.43                 | 147.44 |
| Elevation, m            | 850       | 1220       | 670                    | 635    |
| Air temperature         | 1948-1997 | 1948-1972  | 1981-1991<br>1992-1997 |        |
| Water vapour pressure   |           |            |                        |        |
| Vapour pressure deficit | 1974-1997 | n/a        |                        |        |
| Atmospheric pressure    | 1951-1997 | 1951-1972  |                        |        |
| Low cloud amount        | 1948-1997 | 1948-1972  |                        |        |
| Total cloud amount      |           |            |                        |        |
| Wind speed              |           |            |                        |        |
| Surface temperature     |           |            |                        |        |

948

949 Table 2 Number of snow routes, their total length and number of measurements points –  
 950 maximum and minimum values within the whole period of observations

| Watershed   | Period    | Amount of snow routes | Total length of the route, m | Amount of snow depth measurement points |
|-------------|-----------|-----------------------|------------------------------|-----------------------------------------|
| Yuzhny      | 1960-1997 | 4                     | 1400-1540                    | 144-154                                 |
| Severny     | 1950-1997 | 4/10                  | 1950/2130                    | 23/207                                  |
| Morozova    | 1968-1997 | 2/5                   | 960/2645                     | 98/534                                  |
| Ugroza      | 1983-1997 | 1                     | 1200                         | 120                                     |
| Dozhdemerny | 1959-1971 | 3                     | 3240/5720                    | 327/575                                 |
| Vstrecha    | 1950-1997 | 1/17                  | 2110/10850                   | 119/1091                                |
| Kontaktovy  | 1960-1997 | 2/4                   | 4830/13100                   | 485/1314                                |

951

952 Table 3 Mean, maximum and minimum observed snow water equivalent (SWE) (mm) before  
 953 spring freshet at different landscapes of the Kontaktovy creek watershed, 1960-1997

| Landscape             | SWE  |            |            |
|-----------------------|------|------------|------------|
|                       | mean | max (1985) | min (1964) |
| Forest                | 144  | 265        | 79         |
| Dwarf cedar tree bush | 127  | 247        | 39         |
| Rocky talus           | 100  | 182        | 46         |
| Boulders              | 66   | 127 (1974) | 2          |
| Kontaktovy Creek      | 121  | 213        | 59         |

954

955

956 Table 4 Mean, maximum and minimum snow water equivalent (SWE) (mm) before spring  
 957 freshet at different watersheds within KWBS

| Watershed   | Period    | SWE  |     |     |
|-------------|-----------|------|-----|-----|
|             |           | mean | max | min |
| Yuzhny      | 1960-1997 | 121  | 166 | 70  |
| Severny     | 1950-1997 | 126  | 232 | 62  |
| Morozova    | 1968-1997 | 161  | 298 | 71  |
| Ugroza      | 1983-1994 | 133  | 200 | 93  |
| Dozhdemerny | 1959-1971 | 82   | 111 | 53  |
| Vstrecha    | 1951-1997 | 123  | 213 | 60  |

958

959 Table 5 Mean evapotranspiration (mm) in June – September at different landscapes of KWBS

| # site | Landscape                   | Period    | Elevation, m | Slope aspect | Jun | Jul | Aug | Sep | Total* |
|--------|-----------------------------|-----------|--------------|--------------|-----|-----|-----|-----|--------|
| 1      | Larch forest                | 1962-1997 | 850          | n/a          | 35  | 37  | 30  | 17  | 119    |
| 6      | Swampy sparse growth forest | 1969-1982 | 970          | North        | 37  | 38  | 30  | 19  | 124    |
| 7      | Dwarf cedar tree bush       | 1972-1997 | 1020         | n/a          | 30  | 33  | 25  | 17  | 104    |

|   |                       |           |     |       |    |    |    |    |     |
|---|-----------------------|-----------|-----|-------|----|----|----|----|-----|
| 8 | Dwarf cedar tree bush | 1976-1997 | 900 | South | 47 | 40 | 30 | 14 | 131 |
| 9 | Larch forest          | 1982-1992 | 669 | West  | 36 | 39 | 37 | 24 | 136 |

\*the sum for warm period

960

961

962

Table 6 Maximum depth of thawing at the different landscapes

| # site | Watershed         | Landscape                            | Period                          | Elevation, m | Maximum depth of thawing, cm |
|--------|-------------------|--------------------------------------|---------------------------------|--------------|------------------------------|
| 1      | Kontaktovy        | Forest                               | 1954-1966                       | 841          | 150                          |
| 6      | Dozdemerny        | Rocky talus                          | 1960-1965                       | 1048         | >240                         |
| 9      | Severny, Ugroza   | Rocky talus                          | 1954-1966; 1977-1978            | 986          | 168                          |
| 12     | Vstrecha, Severny | Dwarf cedar tree bush at rocky talus | 1954-1962; 1966-1968; 1971-1997 | 866          | 157                          |
| 15     | Dozdemerny        | Dwarf cedar tree bush at rocky talus | 1958-1968; 1970-1982            | 952          | >150                         |
| 17     | Vstrecha          | Forest                               | 1960-1965, 1969                 | 914          | >124                         |
| 18 bh7 | Kontaktovy        | Peat bogs                            | 1959-1960                       | 835          | 69                           |
| 18 bh8 | Kontaktovy        | Peat bogs                            | 1959-1960                       | 835          | 64                           |

963

964

Table 7 The characteristics of KWBS watersheds

| Code | Catchment (creek – outlet)         | Period    | Area, km <sup>2</sup> | X     | Y      | Stream length, km | Mean watershed width, km | Mean stream slope, ‰ | Mean basin slope, ‰ | Catchment altitude (max-min, mean), m | Mean annual flow, mm | Maximum observed daily discharge, m <sup>3</sup> s <sup>-1</sup> |
|------|------------------------------------|-----------|-----------------------|-------|--------|-------------------|--------------------------|----------------------|---------------------|---------------------------------------|----------------------|------------------------------------------------------------------|
| 1104 | Yuzhny                             | 1960-1997 | 0.27                  | 61.84 | 147.66 | 0.51              | 0.35                     | 235                  | 303                 | 1110-917, 985                         | 193                  | 0.14                                                             |
| 1107 | Severny                            | 1958-1997 | 0.38                  | 61.85 | 147.66 | 0.74              | 0.38                     | 175                  | 388                 | 1300-880, 1020                        | 227                  | 0.18                                                             |
| 1103 | Morozova                           | 1968-1996 | 0.63                  | 61.84 | 147.75 | 0.97              | 0.45                     | 326                  | 649                 | 1700-1100, 1370                       | 453                  | 0.44                                                             |
| 1624 | Ugroza                             | 1983-1991 | 0.67                  | 61.86 | 147.67 | 0.9               | 0.74                     | 218                  | 461                 | 1270-914, 1260                        | 354                  | 0.27                                                             |
| 1106 | Dozdemerny                         | 1952-1971 | 1.43                  | 61.86 | 147.63 | 0.87              | 0.99                     | 220                  | 432                 | 1450-950, 1180                        | 208                  | 0.31                                                             |
| 1105 | Vstrecha                           | 1949-1997 | 5.35                  | 61.85 | 147.66 | 3.4               | 1.5                      | 92                   | 346                 | 1450-833, 1060                        | 237                  | 3.15                                                             |
| 1100 | Kontaktovy – Verkhny               | 1973-1980 | 5.53                  | 61.84 | 147.70 | 2.8               | 2.1                      | 185                  | 473                 | 1700-909, 1070                        | 317                  | 2.52                                                             |
| 1625 | Vstrecha – the mouth of Ugroza Cr. | 1984-1996 | 6.57                  | 61.84 | 147.66 | 3.6               | 1.8                      | 76                   | 406                 | 1450-831, 1070                        | 283                  | 2.6                                                              |
| 1101 | Kontaktovy – Sredny                | 1948-1997 | 14.2                  | 61.84 | 147.67 | 6.2               | 2.8                      | 65.2                 | 413                 | 1700-842, 1120                        | 289                  | 7.02                                                             |
| 1102 | Kontaktovy – Nizhny                | 1948-1997 | 21.3                  | 61.85 | 147.65 | 7.1               | 3.7                      | 57.6                 | 413                 | 1700-823, 1070                        | 281                  | 8.15                                                             |

965

966

Table 8 Water balance of three micro-watersheds of KWBS (mm, %)

| Watershed          | Severny   |           |           | Yuzhny    |           |           | Morozova  |           |
|--------------------|-----------|-----------|-----------|-----------|-----------|-----------|-----------|-----------|
|                    | M         | L         | Z         | M         | L         | Z         | M         | L         |
| Period             | 1958-1997 | 1959-1990 | 1970-1985 | 1960-1997 | 1960-1990 | 1970-1985 | 1969-1997 | 1969-1990 |
| SWE                | 126       | -         | -         | 121       | -         | -         | 161+36    | -         |
| P <sub>rain</sub>  | 263       | -         | -         | 232       | -         | -         | 225       | -         |
| ΔP <sub>corr</sub> | 25        | -         | 70        | 22        | -         | 65        | 55        | -         |
| P <sub>total</sub> | 375       | 357       | 399       | 375       | 332       | 346       | 477       | 451       |
| ET                 | 113       | 120       | -         | 124       | 132       | -         | 73        | 73        |
| E <sub>snow</sub>  | 17        | 0         | -         | 15        | 0         | -         | 19        | 0         |
| E <sub>total</sub> | 130       | 120       | 139       | 139       | 132       | 147       | 92        | 73        |
| R                  | 227       | 236       | 217       | 193       | 199       | 190       | 453       | 448       |
| R (%)              | 56        | 66        | 54        | 51        | 60        | 55        | 95        | 99        |
| η                  | 57        | 1         | 43        | 43        | 1         | 9         | -68       | -70       |
| η (%)              | 14        | 0.3       | 11        | 11        | 0.2       | 3         | 14        | 16        |

967

968

\*M – current research (Makarieva et al.); L – Lebedeva et al. (2017); Z – Zhuravin (2004).

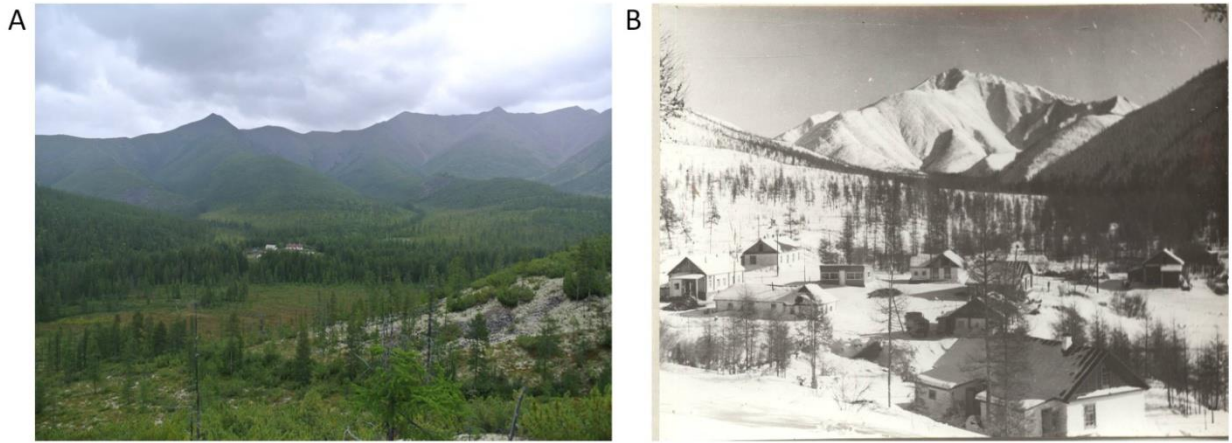

970

971 Fig. 1 The view of the Kolyma Water Balance Station, A – August 2016 (the photo by O. Makarieva), B  
 972 – historical photo from Sushansky (1989)

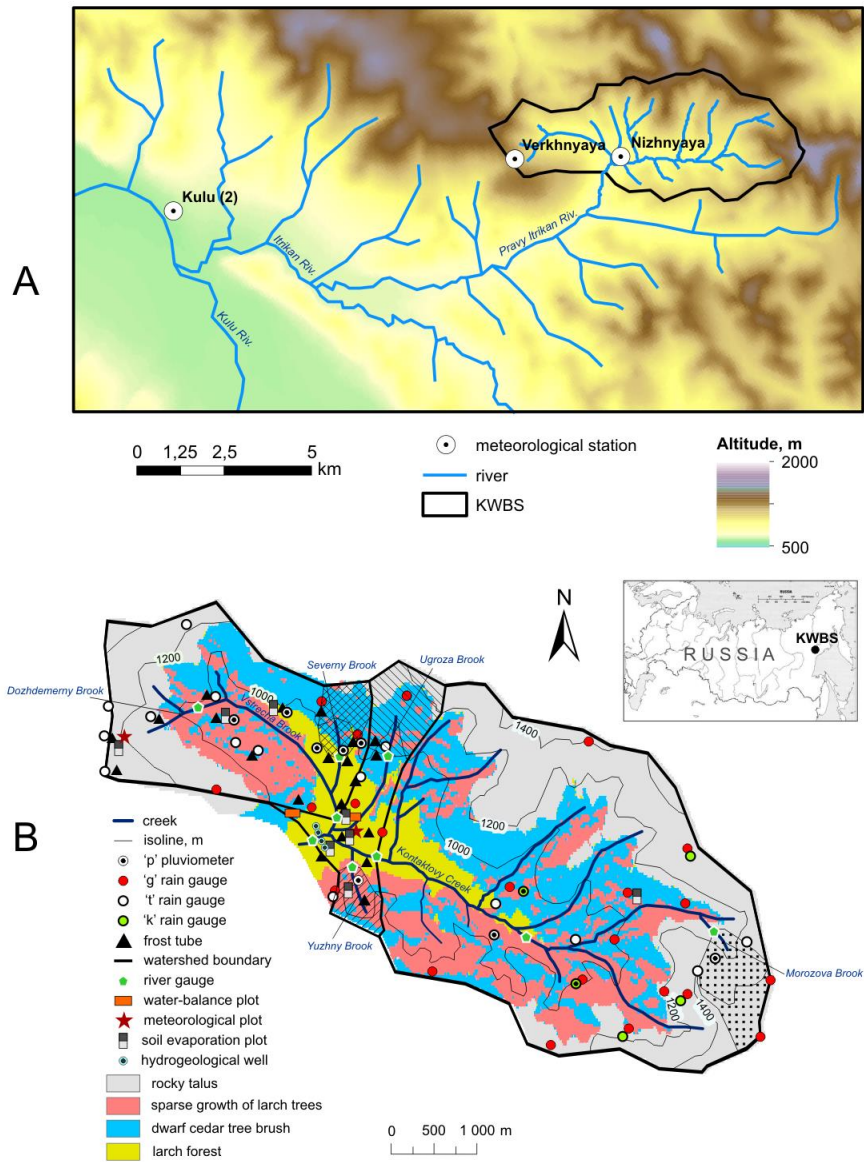

973

974 Fig. 2 Scheme of the Kolyma Water Balance Station (KWBS) indicating the location of observation sites



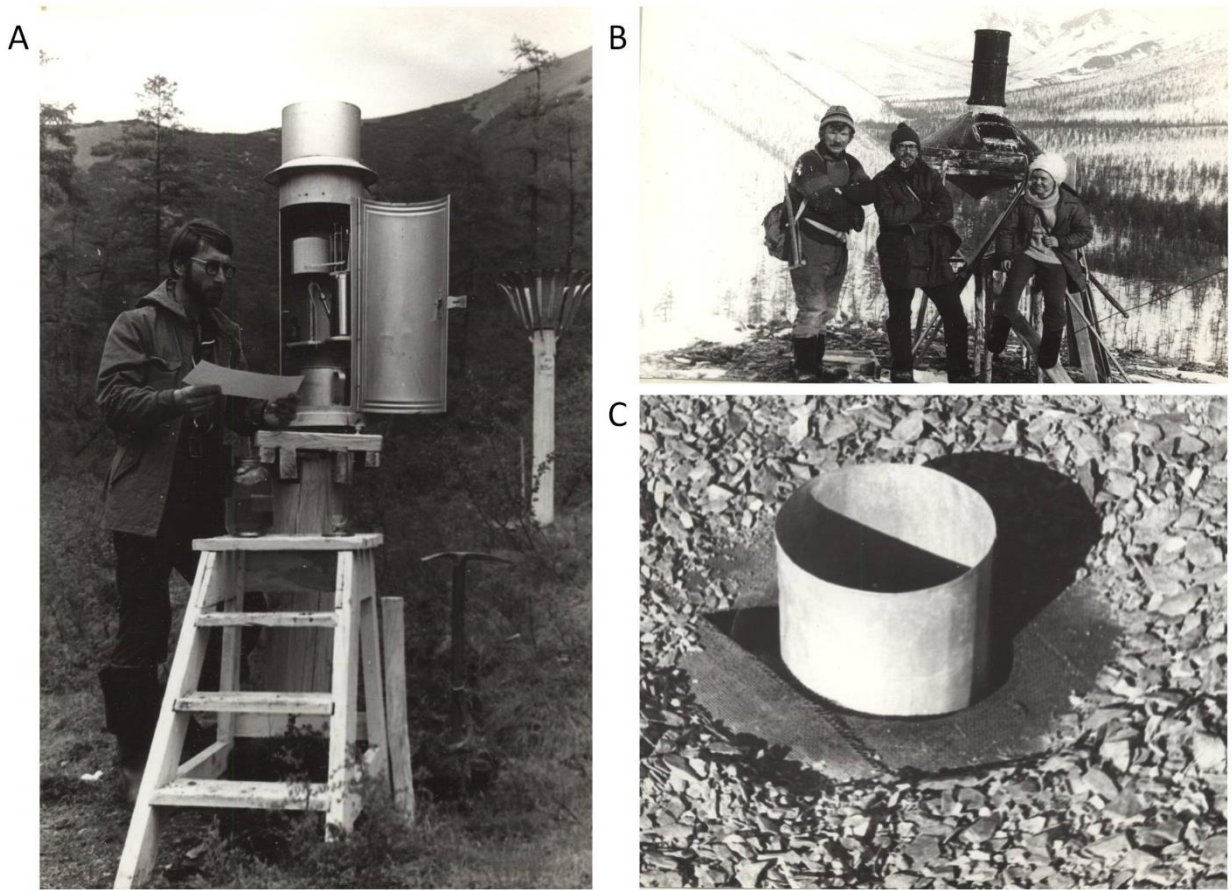

975

976

977

Fig. 3 A – Pluviometer, Tretyakov gauge, B – Kosarev gauge, C – remaining of ground gauge GR-28 (Sushansky, 1988, 1989)

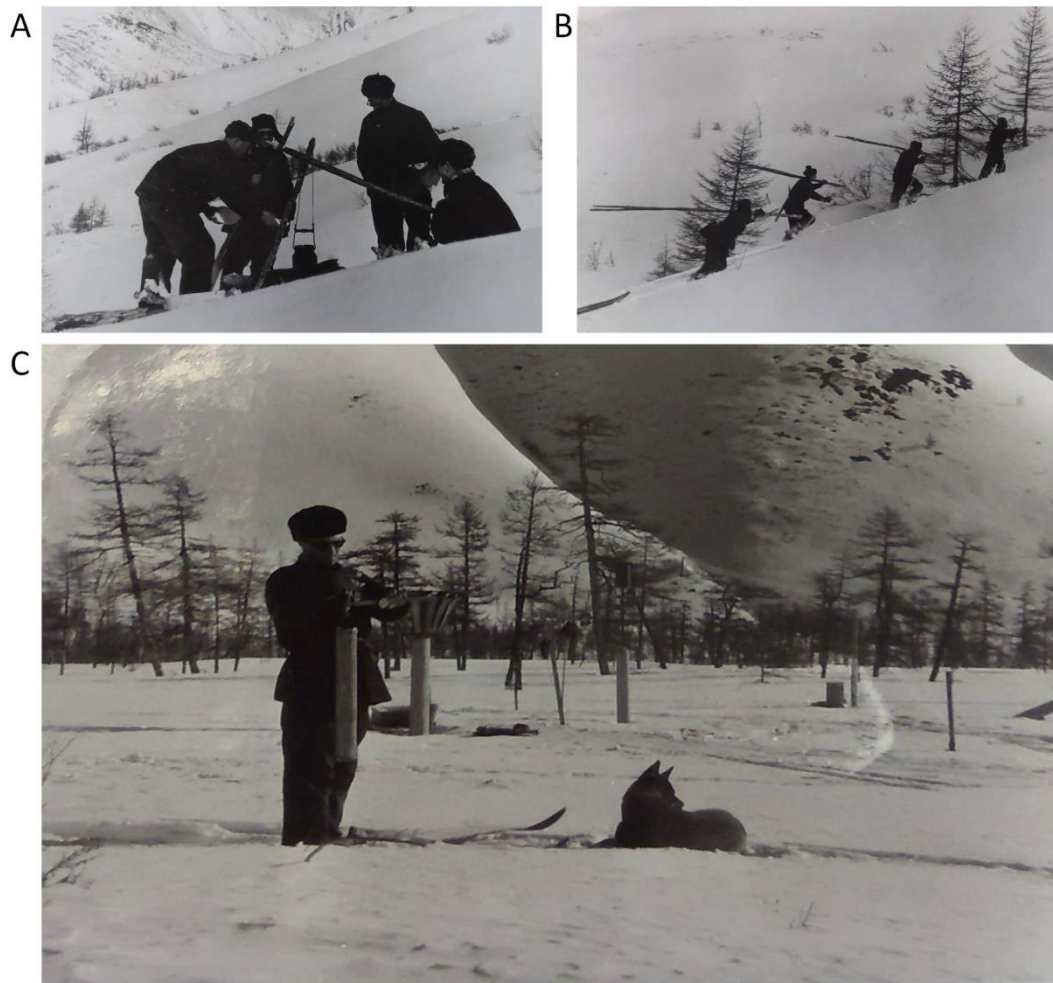

978  
979  
980

Fig. 4 A, B – Snow survey at the Kontaktovy creek catchment; C – measurement of snow density, 1960  
(the photos from the KWBS archive, provided by S.I. Sushansky).

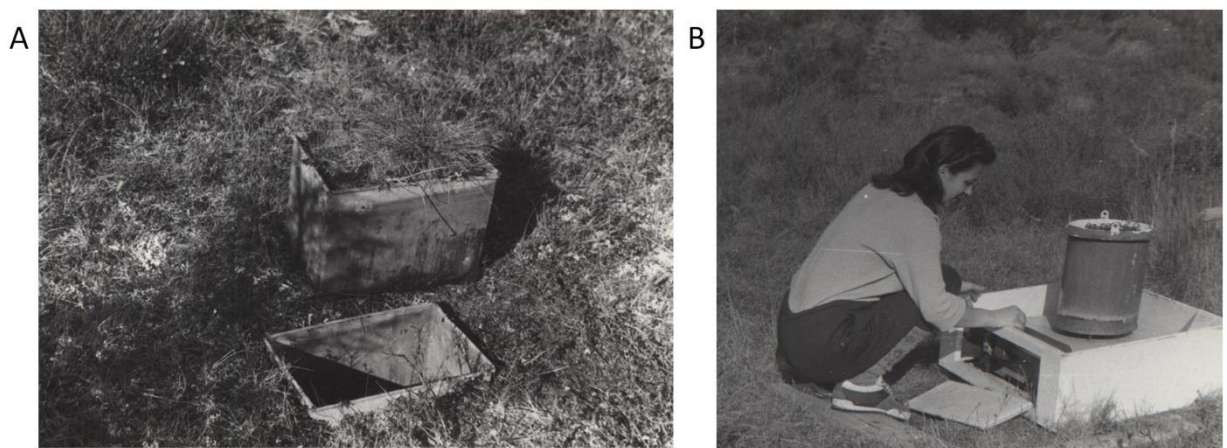

981  
982

Fig. 5 A - Rykachev evaporimeter, B - weighing the GGI-500-30 evaporimeter (Sushansky, 1989)

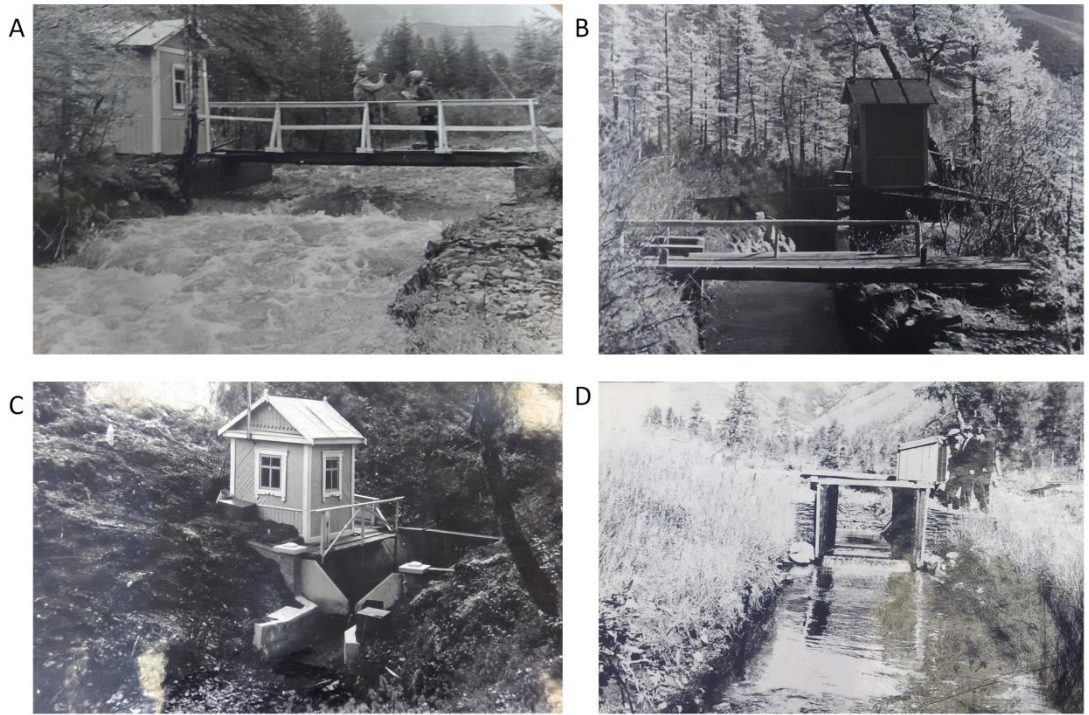

983  
 984  
 985  
 986

Fig. 6 Runoff observations: A – runoff gauge at the Kontakovy creek, 1979; B – runoff gauge at the Dozhdemerny creek, 1959; C – runoff gauge at the Yuzhniy creek, 1960; D – runoff gauge at the Vstrecha creek, 1953 (the photos from the KWBS archive, provided by S.I. Sushansky)



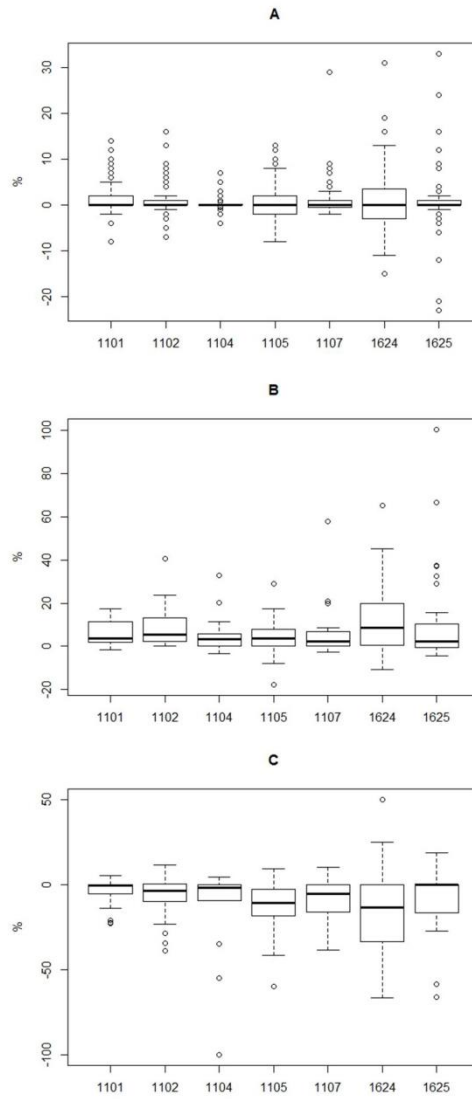

987  
 988  
 989  
 990  
 991

Fig. 7 Characteristics of discharge accuracy, 1984-1997. A – the percentage of extrapolation of stage curves, B, C – the difference between measured and estimated maximum and minimum instant discharges respectively

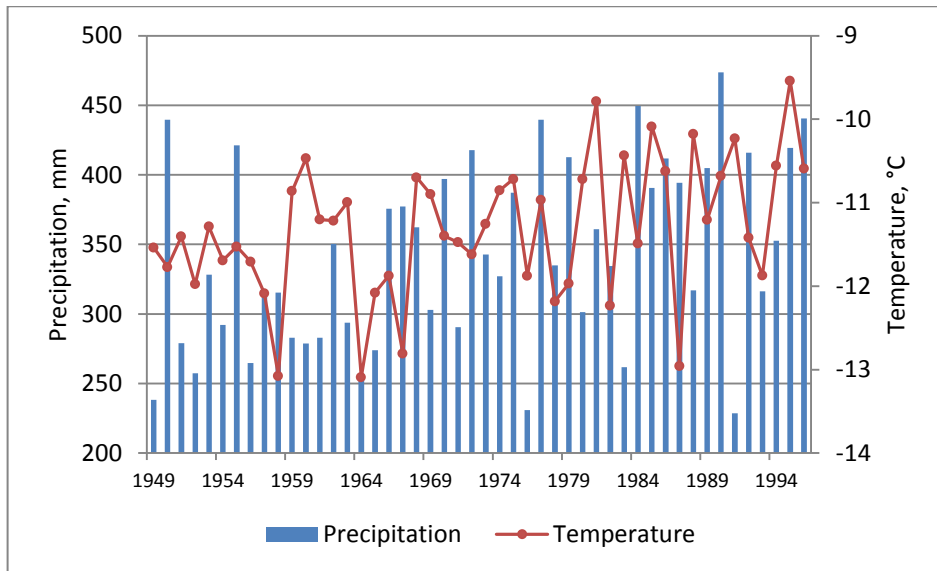

992

993 Fig. 8 Annual precipitation (mm) and air temperature (°C) at Nizhnyaya weather station, 1949-1996

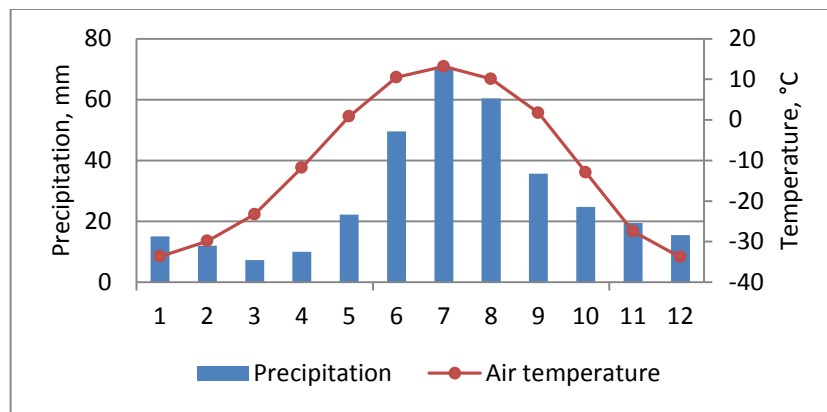

994

995 Fig. 9 Mean monthly precipitation (mm) and air temperature (°C) at Nizhnyaya weather station, 1949-  
996 1996

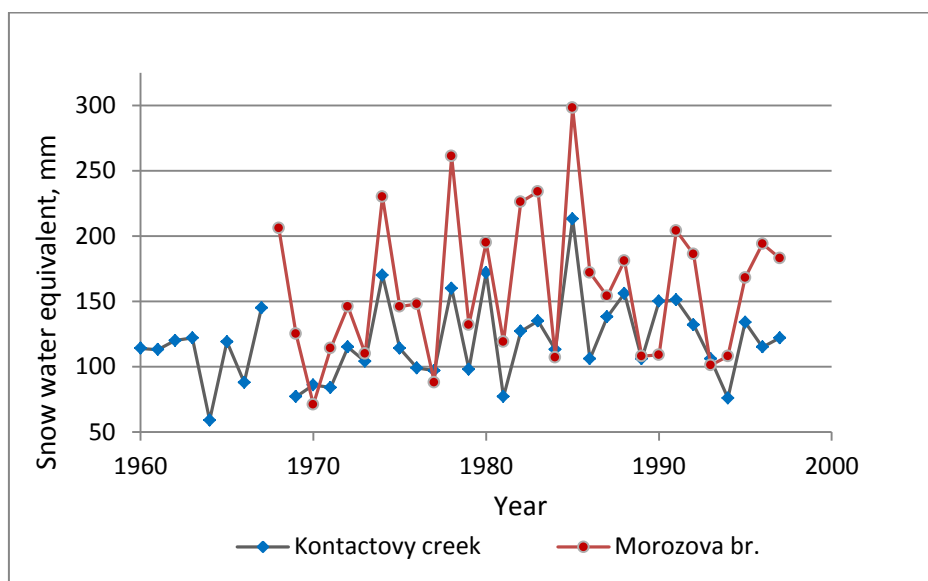

997

998 Fig. 10 Snow water equivalent at the Kontaktovy creek and Morozova br.

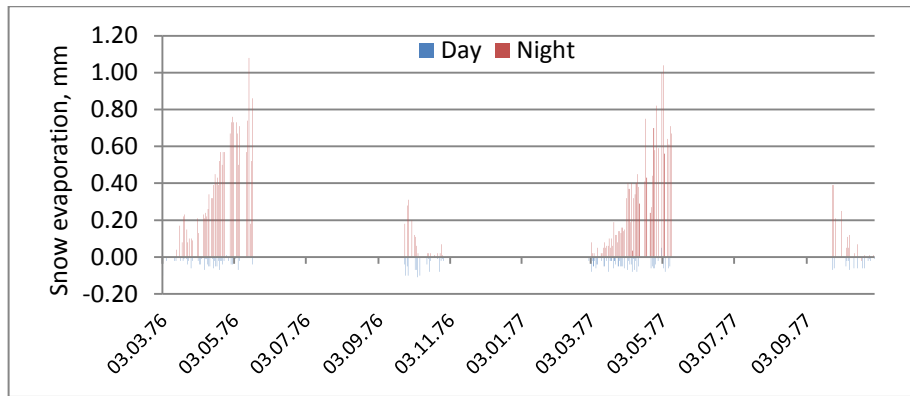

999

1000

1001

Fig. 11 Snow evaporation (mm) during day and night period, 1976-1977

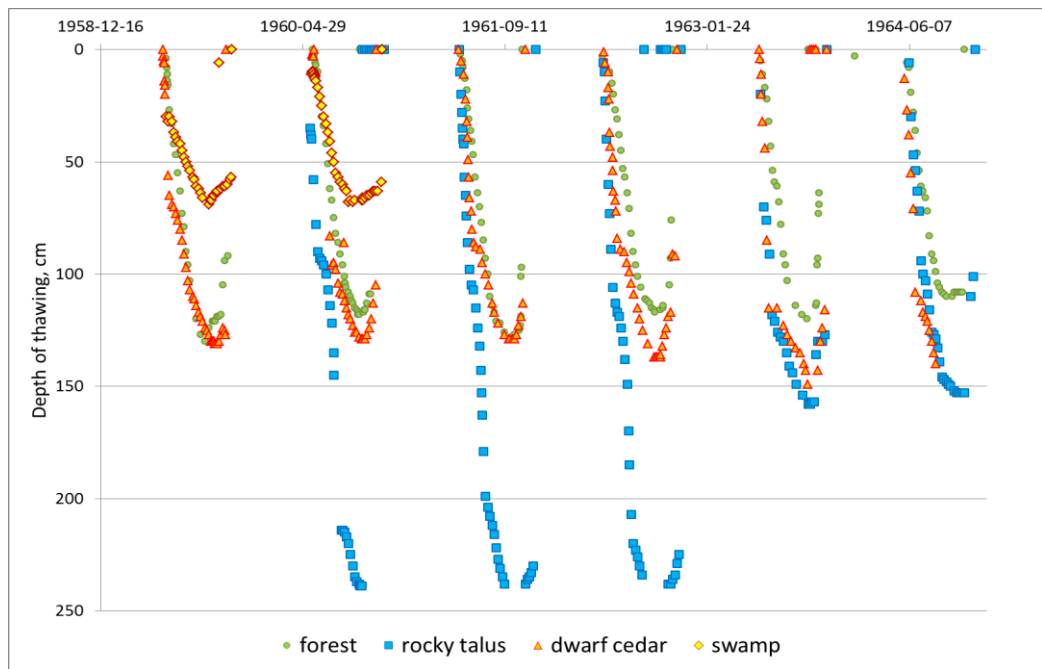

1002

1003

Fig. 12 Depth of ground thawing at the different landscapes of KWBS

1004

1005

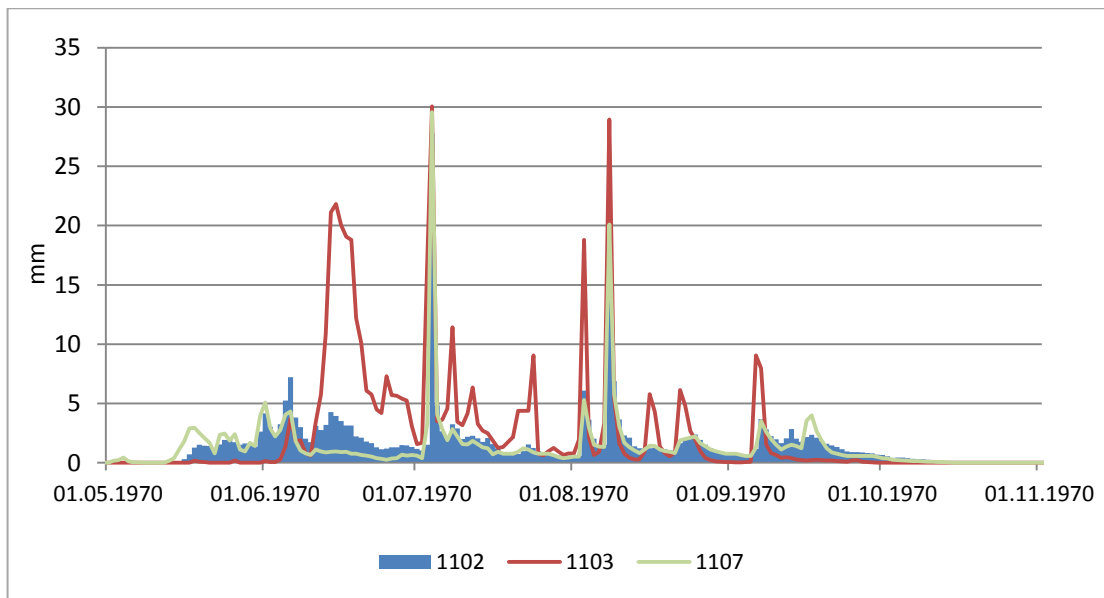

1006

1007 Fig. 13 Flow depth (mm) at the Kontaktovy creek – Nizhny (1102), Severny br. (1107) – south-facing  
 1008 slope with cedar dwarf bush landscape and Morozova br. (1103) – rocky talus landscape at watershed  
 1009 divides, 1970

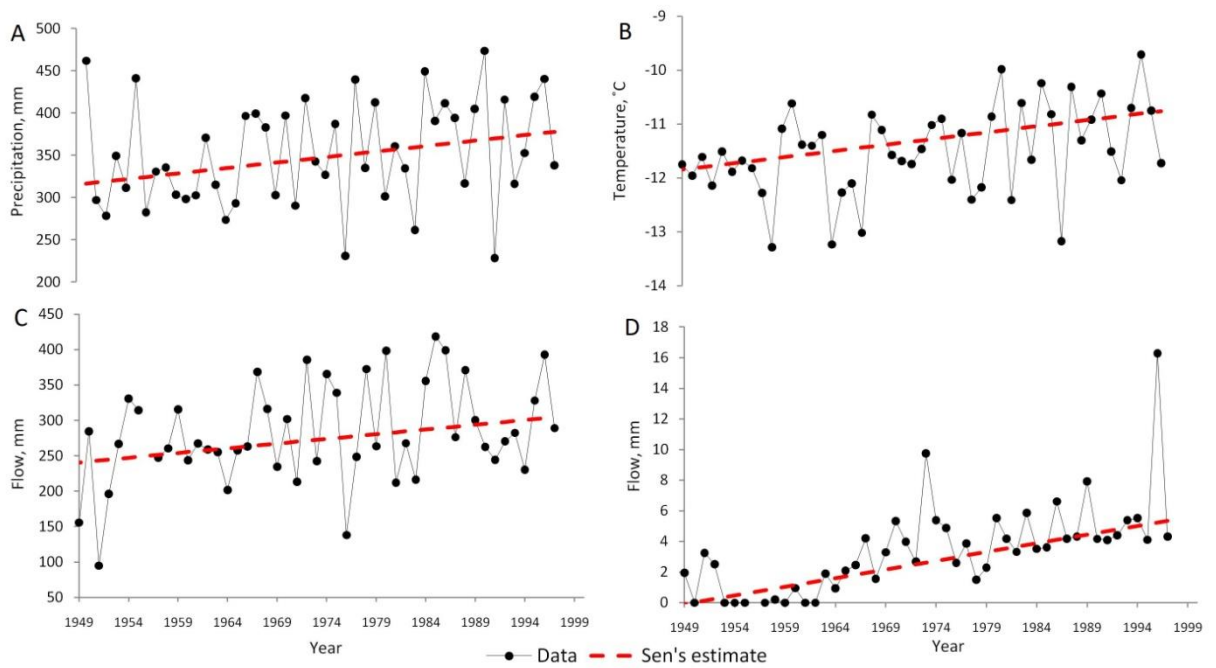

1010

1011 Fig. 14 The trends of hydrometeorological elements, 1949-1997. A - annual precipitation at the  
 1012 Nizhnyaya station; B - annual air temperatures at the Nizhnyaya station; C - annual flow at the  
 1013 Kontaktovy creek – Nizhny; D - flow in October at the Kontaktovy creek – Nizhny

1014
